# Supplementary material for: Implementation of medicines pricing policies in sub-Saharan Africa: protocol for a systematic review
Source: PubMed Central journal article supplement (PMC7907884; doi:10.1136/bmjopen-2020-044293), 2021-02-23
Supplement: bmjopen-2020-044293.draft_revisions.pdf [file bmjopen-2020-044293.draft_revisions.pdf]

# BMJ Open

BMJ Open is committed to open peer review. As part of this commitment we make the peer review history of every article we publish publicly available.

When an article is published we post the peer reviewers' comments and the authors' responses online. We also post the versions of the paper that were used during peer review. These are the versions that the peer review comments apply to.

The versions of the paper that follow are the versions that were submitted during the peer review process. They are not the versions of record or the final published versions. They should not be cited or distributed as the published version of this manuscript.

BMJ Open is an open access journal and the full, final, typeset and author-corrected version of record of the manuscript is available on our site with no access controls, subscription charges or pay-per-view fees (<http://bmjopen.bmj.com>).

If you have any questions on BMJ Open's open peer review process please email [info.bmjopen@bmj.com](mailto:info.bmjopen@bmj.com)

# BMJ Open

## Implementation of medicines pricing policies in sub-Saharan Africa: protocol for a systematic review

|                               |                                                                                                                                                                                                                                                                                                                                                                                                                                                                                                                                                                                                                                                                                                                                                                                                                                                          |
|-------------------------------|----------------------------------------------------------------------------------------------------------------------------------------------------------------------------------------------------------------------------------------------------------------------------------------------------------------------------------------------------------------------------------------------------------------------------------------------------------------------------------------------------------------------------------------------------------------------------------------------------------------------------------------------------------------------------------------------------------------------------------------------------------------------------------------------------------------------------------------------------------|
| Journal:                      | <i>BMJ Open</i>                                                                                                                                                                                                                                                                                                                                                                                                                                                                                                                                                                                                                                                                                                                                                                                                                                          |
| Manuscript ID                 | bmjopen-2020-044293                                                                                                                                                                                                                                                                                                                                                                                                                                                                                                                                                                                                                                                                                                                                                                                                                                      |
| Article Type:                 | Protocol                                                                                                                                                                                                                                                                                                                                                                                                                                                                                                                                                                                                                                                                                                                                                                                                                                                 |
| Date Submitted by the Author: | 29-Aug-2020                                                                                                                                                                                                                                                                                                                                                                                                                                                                                                                                                                                                                                                                                                                                                                                                                                              |
| Complete List of Authors:     | Mirzoev, Tolib; University of Leeds, Nuffield Centre for International Health and Development<br>Koduah, Augustina ; , School of Pharmacy, College of Health Sciences, University of Ghana, P. O. Box LG 43, Legon, Ghana<br>Cronin de Chavez, Anna; University of Leeds, Nuffield Centre for International Health and Development<br>Baatiema, Leonard; University of Ghana<br>Danso-Appiah, Anthony; University of Ghana, Regional Institute for Population Studies<br>Ensor, Tim; University of Leeds Leeds Institute of Health Sciences, Agyepong, Irene; Ghana Health Service<br>Wright, Judy; University of Leeds, Leeds Institute of Health Sciences<br>Kretchy, Irene ; School of Pharmacy, University of Ghana, Department of Pharmacy Practice and Clinical Pharmacy<br>King, Natalie; University of Leeds, Leeds Institute of Health Sciences |
| Keywords:                     | Health policy < HEALTH SERVICES ADMINISTRATION & MANAGEMENT, International health services < HEALTH SERVICES ADMINISTRATION & MANAGEMENT, PUBLIC HEALTH                                                                                                                                                                                                                                                                                                                                                                                                                                                                                                                                                                                                                                                                                                  |
|                               |                                                                                                                                                                                                                                                                                                                                                                                                                                                                                                                                                                                                                                                                                                                                                                                                                                                          |

SCHOLARONE™  
Manuscripts

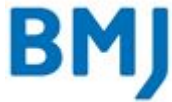

I, the Submitting Author has the right to grant and does grant on behalf of all authors of the Work (as defined in the below author licence), an exclusive licence and/or a non-exclusive licence for contributions from authors who are: i) UK Crown employees; ii) where BMJ has agreed a CC-BY licence shall apply, and/or iii) in accordance with the terms applicable for US Federal Government officers or employees acting as part of their official duties; on a worldwide, perpetual, irrevocable, royalty-free basis to BMJ Publishing Group Ltd ("BMJ") its licensees and where the relevant Journal is co-owned by BMJ to the co-owners of the Journal, to publish the Work in this journal and any other BMJ products and to exploit all rights, as set out in our [licence](#).

The Submitting Author accepts and understands that any supply made under these terms is made by BMJ to the Submitting Author unless you are acting as an employee on behalf of your employer or a postgraduate student of an affiliated institution which is paying any applicable article publishing charge ("APC") for Open Access articles. Where the Submitting Author wishes to make the Work available on an Open Access basis (and intends to pay the relevant APC), the terms of reuse of such Open Access shall be governed by a Creative Commons licence – details of these licences and which [Creative Commons](#) licence will apply to this Work are set out in our licence referred to above.

Other than as permitted in any relevant BMJ Author's Self Archiving Policies, I confirm this Work has not been accepted for publication elsewhere, is not being considered for publication elsewhere and does not duplicate material already published. I confirm all authors consent to publication of this Work and authorise the granting of this licence.

1  
2  
3 **Title:** Implementation of medicines pricing policies in sub-Saharan Africa: protocol for a systematic  
4 review  
5  
6  
7  
8

9 **Authors:**

- 10  
11
  - Dr Tolib Mirzoev\*, University of Leeds, [t.mirzoev@leeds.ac.uk](mailto:t.mirzoev@leeds.ac.uk)
  - Dr Augustina Koduah, University of Ghana, [akoduah@ug.edu.gh](mailto:akoduah@ug.edu.gh)
  - Dr Anna Cronin de Chavez, University of Leeds, [A.Chavez@leeds.ac.uk](mailto:A.Chavez@leeds.ac.uk)
  - Dr Leonard Baatiema, University of Ghana, [baatiemaleonard@gmail.com](mailto:baatiemaleonard@gmail.com)
  - Dr Anthony Danso-Appiah, University of Ghana, [adanso-appiah@ug.edu.gh](mailto:adanso-appiah@ug.edu.gh)
  - Professor Tim Ensor, University of Leeds, [T.R.A.Ensor@leeds.ac.uk](mailto:T.R.A.Ensor@leeds.ac.uk)
  - Professor Irene Agyepong, Ghana Health Service, [irene.agyepong@gmail.com](mailto:irene.agyepong@gmail.com)
  - Mrs Judy Wright, University of Leeds, [J.M.Wright@leeds.ac.uk](mailto:J.M.Wright@leeds.ac.uk)
  - Dr Irene Kretchy, University of Ghana, [ikretchy@ug.edu.gh](mailto:ikretchy@ug.edu.gh)
  - Ms Natalie King, University of Leeds, [N.V.King@leeds.ac.uk](mailto:N.V.King@leeds.ac.uk)

12  
13  
14  
15  
16  
17  
18  
19  
20  
21  
22  
23  
24  
25

26 \*Corresponding author: Nuffield Centre for International Health and Development, Level 10 Worsley  
27 Building, Clarendon Way, Leeds LS2 9NL. [t.mirzoev@leeds.ac.uk](mailto:t.mirzoev@leeds.ac.uk) +44(0)113-343-4869  
28  
29  
30  
31

32 **Keywords**

33 Systematic review; medicine pricing; policy implementation; sub-Saharan Africa; global health  
34  
35  
36

37 **Word count**

38 2,228 words  
39  
40  
41  
42  
43  
44  
45  
46  
47  
48  
49  
50  
51  
52  
53  
54  
55  
56  
57  
58  
59  
60

## Abstract

### Introduction

Ensuring universal availability and accessibility of medicines and supplies is critical for national health systems to equitably address population health needs. In sub-Saharan Africa (SSA), this is a recognised policy priority with multiple medicines pricing policies enacted. However, medicine prices have remained high and continued to rise. In this systematic review, we aim to identify and analyse experiences of successful implementation of medicines pricing policies in SSA in order to inform improved implementation of Ghanaian policies.

### Methods and analysis

Eight electronic databases, grey literature and reference lists from previous similar reviews will be searched. Published peer-reviewed studies of implementation of medicines pricing policies in sub-Saharan Africa will be eligible for inclusion. Broader policy analyses and documented experiences of implementation of other health policies will be excluded. The team will collaboratively screen titles and abstracts, then two reviewers will independently screen full-texts, extract data and assess quality of the included studies. Disagreements will be resolved by discussion or a third reviewer. Data will be extracted on approaches used for policy implementation, actors involved, evidence used in decision-making and key contextual influences on policy implementation. A narrative approach will be used to synthesise the data. Reporting will be informed by the Preferred Reporting Items for Systematic Review and Meta-Analysis Protocols (PRISMA) guideline.

### Ethics and dissemination

No ethics approvals are required for systematic reviews.

Results will be disseminated through academic publications, policy briefs and presentations to national policymakers in Ghana.

### Registration details

Prospero registration number: CRD42020178166, full record:

[https://www.crd.york.ac.uk/prospero/display\\_record.php?ID=CRD42020178166](https://www.crd.york.ac.uk/prospero/display_record.php?ID=CRD42020178166)

## Article summary

### ***Strengths and limitations of this study***

- This systematic review protocol follows the Preferred Reporting Items for Systematic Review and Meta-Analysis Protocols (PRISMA-P) guidelines
- The review addresses a gap in the current knowledge of the determinants of successful implementation of medicines pricing policies in sub-Saharan Africa
- The focus on sub-Saharan Africa (SSA) will help with transferability of lessons across the different countries within the region, though may lead to omission of important experiences for example from Asia and Latin America and may limit transferability of lessons outside the SSA.
- The search will be restricted to peer-reviewed published articles and grey literature, thus relevant theses and conference abstracts are likely to be omitted and may affect the depth of evidence on the topic.
- The narrative synthesis approach reflects the nature of published evidence on the topic of policy implementation with no meta-analysis possible, and is a potential limitation of this review

## Introduction

The current agenda of Universal Health Coverage (UHC) highlights the importance of access to safe, quality and affordable medicines as a key driver in the attainment of the UHC.<sup>1-3</sup> Increasing access to essential medicines through medicines pricing interventions is also an issue of current health policy discourses.<sup>4,5</sup> In response, various policy initiatives have evolved to regulate medicine pricing and improve access.

Globally, different medicine pricing models and strategies exist and these include generic or biosimilar price linked to originator product, non-proprietary prescribing and generic substitution, tendering and pooled procurement, internal reference pricing, external price referencing or international price comparisons, and managed-entry agreement.<sup>6-8</sup> Implementation of these medicine pricing policies may be dependent on pricing levels of the medicines, whether it is generic, be it out-patient or in-patient service.<sup>9</sup>

Many of these medicine pricing policies are being implemented in high income countries. However, unlike high income countries, low and middle income countries (LMICs) have less regulated and developed pharmaceutical markets.<sup>1</sup> In light of this, multiple medicine pricing models and strategies are required to achieve equitable access to safe, quality and affordable medicines.<sup>10</sup>, particularly, in sub-Saharan African countries (SSA).<sup>10</sup>

## Rationale

Ensuring availability and accessibility of medicines is an important mechanism by which national health systems can equitably address the health needs of the population, including the poorest and most vulnerable. In SSA, this is a recognised policy priority. For example, in the last two decades different medicines pricing policy were implemented in South Africa<sup>11,12</sup> and between 2012 and 2017, the Government of Ghana introduced four policies to improve access to medicines through medicine price regulation, and ultimately health outcomes and quality of life. These policies currently at different stages of their implementation and despite these efforts, medicine prices have remained high and continued to rise in many countries. This raises questions as to why and how these policies are failing to achieve the desired outcomes.

In this review, we will explore the effectiveness of implementation of medicines pricing policies in the sub-Saharan African context. We want to identify which policies have been implemented and then explore three broad dimensions of their implementation. First, we want to understand *what happened* i.e. identify evidence on effective implementation of medicines pricing policies reflected in reduction in prices and improvement in access to medicines and subsequently healthcare. Second, we want to understand *how it happened* i.e. we will identify and unpack the implementation processes and approaches deployed in terms of their timing, participation of actors and role of evidence. Third, we want to understand *why it happened*. We will synthesise the key reported facilitators and barriers to the implementation and understand how they affected the implementation of these policies within their respective contexts.

## Aim and objectives

1  
2  
3 In this review we will address the following overall question: what are the key determinants of  
4 successful implementation of medicines pricing policies in sub-Saharan African (SSA) countries?  
5 More specifically, we will answer four questions:  
6

- 7 a. Which medicines pricing policies have been implemented in SSA and what are their key  
8 elements?
- 9 b. How have these policies been implemented (in relation to implementation approaches,  
10 processes, involvement of actors, role of evidence etc)?
- 11 c. Which key facilitators and barriers affected the implementation of medicines pricing policies,  
12 and how?
- 13 d. Which implementation of medicines pricing policies in SSA are effective (in relation to reducing  
14 prices of medicines and improving access to services)?  
15

16 This review is being undertaken during April – November 2020 as part of the project on ‘Improving  
17 equitable access to essential medicines in Ghana through bridging the gaps in implementing  
18 medicines pricing policy’ (AMIPS) – a NIHR-funded award received jointly by the University of Leeds  
19 and University of Ghana. The results of this review will be combined with results of policy analyses in  
20 Ghana and will inform engagements with key stakeholders on improving the implementation of the  
21 current policies and identification of future research and development priorities on the topic.  
22

23 This protocol follows the Preferred reporting items for systematic review and meta-analysis  
24 protocols (PRISMA-P) guidelines<sup>13</sup> and a PRISMA-P checklist is available as a supplementary file.  
25  
26  
27  
28

## 29 **Methods and analysis**

### 30 ***Eligibility criteria***

#### 31 **Studies**

32 We will include: both empirical studies (including Randomised Controlled Trials (RCTs), quasi-  
33 experimental studies and cohort and cross-sectional studies). Reviews (scoping reviews, meta-  
34 syntheses, realist syntheses) will be included and individual primary studies from the systematic  
35 reviews will be manually included as empirical literature. We will exclude opinion pieces and  
36 conceptual/theoretical publications, which do not report documented empirical data from either  
37 primary studies or reviews.  
38

39 Specific inclusion criteria will be: (a) Focus on the medicines pricing policies i.e. policies, strategies,  
40 interventions or plans which aim to improve affordability of medicines in the country. The link to  
41 improvements in access to healthcare may be implicit and is not a requirement; (b) Focus on policy  
42 implementation i.e. either as part of the whole policy process (agenda-setting, development,  
43 implementation) or as an exclusive focus; (c) sub-Saharan African country contexts i.e. either as part  
44 of the comparative studies or as a sole focus; (d) studies which were published since the agenda of  
45 Millennium Development Goals was initiated shortly before 2000; and (e) papers with relevant  
46 information available for analysis.  
47

48 Specific exclusion criteria are: (a) policy analyses which focus solely on policy agenda-setting and  
49 development stages of the policy process; (b) Studies from high-income country contexts and  
50 outside sub-Saharan Africa; (c) studies conducted two years or more prior to 2000 but published  
51 after 2000, will be excluded, in consideration of MDG and SDG agenda which started in 2000; (d)  
52 papers in languages where we are unable to have the resources for translation (the team has access  
53 to French, Spanish and Russian-speaking researchers) and (e) papers with no full text available for  
54 analysis.  
55  
56  
57  
58  
59  
60



## Participants

The participants to be covered in the review will be: policymakers, implementers, service providers, patients and beneficiaries of successful implementation of medicines pricing policies (of any gender, age, ethnicity, socio-economic group, health status or urban-rural residence).

## Interventions

Implementation of medicines pricing policies i.e. policies, strategies, interventions or plans which aim to improve affordability of medicines in the country.

## Comparison

No comparison or control is applicable to this study

## Outcomes

Successful implementation will be measured as reduction in medicines prices, and improved access to medicines along the supply chain. Any studies describing unsuccessful implementation will also be used to inform the lessons learned.

## Study records

### Searches

We will search relevant databases: Medline (1946 – present), Web of Science (1990 – present), Scopus (1823 – present), Global Health (1973 – present), Embase (1947 – present), Cairn.Info International Edition (all available years), Erudit (all available years) and African Index Medicus (all available years). The Medline search strategy is available as a supplementary file. The search strategies will incorporate index terms (MeSH) and text words for the search concepts:

1. Sub-Saharan African Countries. This will include terms/synonyms for sub-Saharan Africa AND list of individual countries in the region
2. Drug/Medicines pricing. This will include terms/synonyms for: medicines / pharmaceuticals / drugs / prescriptions AND pricing / cost / affordability / fees / purchase / rebate(s) / tariffs / incentives / benchmarking / reference pricing / payment / spend\* / expenditure / subsid\* / procurement
3. Policy. This will include terms/synonyms for: policy / strategy / plan / framework / regulations / guidelines / rules / intervention / tax / exemption
4. Implementation. This will include terms/synonyms for: Implementing / Implement(s) / Implementation approach(es) / Process(es) / Facilitator(s) / Barrier(s) / Factors / Determinants / context

The searches will be limited to the literature published from the year 2000 and onwards. This is in consideration of the Millennium Development Goals agenda which started in 2000 with a clear focus on improving access to medicines and services. We will follow-up on the references to the individual studies as required. We will manually search for the included references in relevant retrieved reviews (systematic reviews, scoping reviews, meta-syntheses, realist syntheses) for additional relevant studies for inclusion. In addition, we will search grey literature including global development websites: WHO IRIS, World Bank, DFID/K4D repository, Gates Foundation and contacts with experts in the field.

## Data management

We will upload all references identified through searches (electronic database and additional searches) into Endnote version X9. Once duplicates are removed, the remaining references will be exported into Rayyan (<https://rayyan.qcri.org/welcome>), an online free systematic review tool for screening

## Screening

Titles and abstracts will be divided up across the review team and screened individually for eligibility using pre-specified eligibility criteria flowchart, which is available in a supplementary file. At least 20% of individually reviewed titles and abstracts will then be cross-checked by at least two of the team.. Full texts will be obtained for all the potentially relevant studies and screened by two members of the team independently, and disagreements will be resolved through discussion. Where necessary, a third member of the team will engage to help resolve disagreements.

## Data extraction

The following data will be extracted by two members of the review team into an appropriate data extraction form: article information (full citation, year study was conducted, study type, setting / country); medicine pricing policies studied (including which key elements the policies included); documented effects on prices of medicines (including how identified and reported); effects on access to medicines (including how identified and reported); effects on access to healthcare (including how identified and reported); implementation approach (including processes, actors involved and their roles and evidence used to inform implementation); key influences on policy implementation (including facilitators and constraints and how they affected implementation).

## Quality assessment and risk of bias

Quality of each included study will be appraised. We will utilise validated quality assessment tools and the critical appraisal tools for relevant studies (qualitative and quantitative research) from the Joanna Briggs Institute [https://joannabriggs.org/ebp/critical\\_appraisal\\_tools](https://joannabriggs.org/ebp/critical_appraisal_tools). While at this point, we do not intend to change the actual criteria, the interpretation and application of the tools will be within the context of our study which focuses on key determinants of effective implementation of medicines pricing policies in sub-Saharan African contexts. For example, clarity of focus will be assessed in relation to how the different aspects of policy implementation (processes, use of evidence, involvement of actors) are identified and consistently used in the reviewed papers.

A careful assessment of risk of bias in the included studies will be performed by two reviewers, who will first independently assess the quality of each study against each criterion. Results will be shared and agreed, and any disagreements will be addressed through engaging a third reviewer.

## Data synthesis and interpretation

### Strategy for data synthesis.

The main outcome in our study is the medicine pricing policy implementation. Policy implementation is typically done within a single country, but where the same policy is implemented in different countries, the analysis will take the specific context of the country into consideration.

In exploring the policy implementation, we will employ established policy theories and frameworks such as Walt and Gilson's policy triangle<sup>14</sup>, Baumgartner's punctuated equilibrium<sup>15</sup> and Lipsky's

1  
2  
3 street-level bureaucracy<sup>16</sup>, and will also draw upon further theories and frameworks developed or  
4 adapted within the reviewed papers.  
5

6 Where possible, we will attempt to compare the effects of the policies in a quantitative synthesis.  
7 We anticipate, however, that the heterogeneity of reporting of outcomes and of context, may make  
8 it impossible to conduct a meta-analysis. In such a situation we will focus on narrative synthesis.  
9

10 Whilst using qualitative or narrative synthesis approach<sup>17</sup>, data related to the medicines pricing  
11 policies will be extracted from the Introduction, Methods and possibly Results. Data on the effects of  
12 policy implementation and the policy implementation approaches, and key influences will be  
13 extracted from the Results and Discussion sections. Extracted data will be analysed thematically and  
14 will be structured around the specific questions of the review.  
15

16 The interpretation of the results will follow the identified themes for each review question. For  
17 example, in answering the third review question we will divide the factors into facilitators and  
18 constraints and potentially will further sub-divide them by their nature (e.g. community issues,  
19 health systems issues, wider socio-economic influences).  
20

21 At the moment, we are not planning analysis of sub-groups or sub-sets. However, depending on the  
22 breadth of extracted data we may consider sub-groups such as geographical region (West Africa,  
23 East Africa, Southern Africa), setting (urban, rural) or categories of implementers (health facilities,  
24 pharmacies).  
25

### 26 ***Patient and public involvement***

27

28  
29 This review will use published data, therefore, no direct patient and public involvement in the  
30 design, interpretation or dissemination of the findings is planned.  
31

### 32 **Ethics and dissemination**

33

34  
35  
36  
37  
38  
39  
40  
41  
42  
43  
44  
45  
46  
47  
48  
49  
50  
51  
52  
53  
54  
55  
56  
57  
58  
59  
60  
Ethics approvals are not required for systematic reviews. However, ethics approvals for the wider  
AMIPS study within which this review is being undertaken have been granted by the ethics  
committees from the Ghana Health Service (ref GHS-ERC006/02/20) and the University of Leeds  
School of Medicine (ref MREC 19-060).

We shall disseminate results through academic papers and stakeholder workshops in Ghana and  
other SSA countries, where necessary. In Ghana, the review results will be complemented by reviews  
of policy documents. The findings of the review will also be presented at scientific conferences such  
as the Global Symposia on Health Systems Research and Thematic Working Groups of the Health  
Systems Global.

The results of this review will inform empirical investigations of implementation of medicines pricing  
policies in Ghana through the in-depth interviews and focus groups, as well as engagements and  
consultations with policymakers on seeking ways of further improving the implementation of  
medicines pricing policies in Ghana.

### 55 **References**

1. Bigdeli M, Laing R, Tomson G. Medicines and universal health coverage: challenges and opportunities: BioMed Central, 2015.

2. Ghebreyesus TA. All roads lead to universal health coverage. *The Lancet Global Health* 2017;5(9):e839-e40.
3. Wirtz VJ, Hogerzeil HV, Gray AL, et al. Essential medicines for universal health coverage. *The Lancet* 2017;389(10067):403-76.
4. World Health O, Regional Office for E. Access to new medicines in Europe : technical review of policy initiatives and opportunities for collaboration and research. 2015
5. World Health Organization. Assessment of medicine pricing and reimbursement systems in health insurance schemes. 2016
6. Bashaar M, Hassali F, Alrasheedy A, et al. Efficacy of international approaches to medicine price regulation and control: A scoping review. *J Appl Pharm Sci* 2017;7(04):227-41.
7. Leopold C, Vogler S, Mantel-Teeuwisse AK, et al. Differences in external price referencing in Europe—a descriptive overview. *Health Policy* 2012;104(1):50-60.
8. Vogler S, Paris V, Ferrario A, et al. How can pricing and reimbursement policies improve affordable access to medicines? Lessons learned from European countries. *Applied health economics and health policy* 2017;15(3):307-21.
9. Vogler S, Zimmermann N, de Joncheere K. Policy interventions related to medicines: Survey of measures taken in European countries during 2010–2015. *Health Policy* 2016;120(12):1363-77.
10. Nguyen TA, Knight R, Roughead EE, et al. Policy options for pharmaceutical pricing and purchasing: issues for low-and middle-income countries. *Health policy and planning* 2015;30(2):267-80.
11. Moodley R, Suleman F. Evaluating the impact of the single exit price policy on a basket of originator medicines in South Africa from 1999 to 2014 using a time series analysis. *BMC Health Services Research* 2019;19(1):576. doi: 10.1186/s12913-019-4403-8
12. Steyn R, Burger JR, Serfontein JHP, et al. Influence of a new reference-based pricing system in South Africa on the prevalence and cost of antidiabetic medicine: a pilot study. *International Journal of Pharmacy Practice* 2007;15(4):307-11. doi: 10.1211/ijpp.15.4.0009
13. Shamseer L, Moher D, Clarke M, et al. Preferred reporting items for systematic review and meta-analysis protocols (PRISMA-P) 2015: elaboration and explanation. *BMJ : British Medical Journal* 2015;349:g7647. doi: 10.1136/bmj.g7647
14. Walt G, Gilson L. Reforming the health sector in developing countries: the central role of policy analysis. *Health Policy Plan* 1994;9(4):353-70.
15. Baumgartner F, Jones B. Agendas and Instability in American Politics. Chicago, London: University of Chicago Press 1993.
16. Lipsky M. Street-level bureaucracy: dilemmas of the individual in public services New York: Russel Sage Foundation 1980.
17. Snilstveit B, Oliver S, Vojtkova M. Narrative approaches to systematic review and synthesis of evidence for international development policy and practice. *Journal of Development Effectiveness* 2012;4(3):409-29. doi: 10.1080/19439342.2012.710641

## Authors' contributions

AK and TM jointly conceived the study; TM, AK, AC, LB, TDA, TE, IA, JW, IK, NK contributed to the review design and jointly wrote the protocol; TM, AK, AC, LB, TDA, TE, IA, JW, IK, NK read and approved the final version of the manuscript.

## Funding

This research was commissioned by the National Institute for Health Research (NIHR) NIHR Global Health Policy and Systems Research Development Award using UK aid from the UK Government (grant number 130219). The views expressed in this publication are those of the author(s) and not necessarily those of the NIHR or the Department of Health and Social Care

## Competing interests

None declared

For peer review only

**Title:** Implementation of medicines pricing policies in sub-Saharan Africa: protocol for a systematic review

PRISMA-P (preferred reporting items for systematic review and meta-analysis protocols) 2015 checklist: recommended items to address in a systematic review protocol

| <i>Section and topic</i>          | <i>Item No</i> | <i>Checklist item</i>                                                                                                                                                                                                         | <i>Y/N</i> |
|-----------------------------------|----------------|-------------------------------------------------------------------------------------------------------------------------------------------------------------------------------------------------------------------------------|------------|
| <b>Administrative information</b> |                |                                                                                                                                                                                                                               |            |
| Title:                            |                |                                                                                                                                                                                                                               |            |
| Identification                    | 1a             | Identify the report as a protocol of a systematic review                                                                                                                                                                      | Y          |
| Update                            | 1b             | If the protocol is for an update of a previous systematic review, identify as such                                                                                                                                            | Y          |
| Registration                      | 2              | If registered, provide the name of the registry (such as PROSPERO) and registration number                                                                                                                                    | Y          |
| Authors:                          |                |                                                                                                                                                                                                                               |            |
| Contact                           | 3a             | Provide name, institutional affiliation, e-mail address of all protocol authors; provide physical mailing address of corresponding author                                                                                     | Y          |
| Contributions                     | 3b             | Describe contributions of protocol authors and identify the guarantor of the review                                                                                                                                           | Y          |
| Amendments                        | 4              | If the protocol represents an amendment of a previously completed or published protocol, identify as such and list changes; otherwise, state plan for documenting important protocol amendments                               | n/a        |
| Support:                          |                |                                                                                                                                                                                                                               |            |
| Sources                           | 5a             | Indicate sources of financial or other support for the review                                                                                                                                                                 | Y          |
| Sponsor                           | 5b             | Provide name for the review funder and/or sponsor                                                                                                                                                                             | Y          |
| Role of sponsor or funder         | 5c             | Describe roles of funder(s), sponsor(s), and/or institution(s), if any, in developing the protocol                                                                                                                            | Y          |
| <b>Introduction</b>               |                |                                                                                                                                                                                                                               |            |
| Rationale                         | 6              | Describe the rationale for the review in the context of what is already known                                                                                                                                                 | Y          |
| Objectives                        | 7              | Provide an explicit statement of the question(s) the review will address with reference to participants, interventions, comparators, and outcomes (PICO)                                                                      | Y          |
| <b>Methods</b>                    |                |                                                                                                                                                                                                                               |            |
| Eligibility criteria              | 8              | Specify the study characteristics (such as PICO, study design, setting, time frame) and report characteristics (such as years considered, language, publication status) to be used as criteria for eligibility for the review | Y          |
| Information sources               | 9              | Describe all intended information sources (such as electronic databases, contact with study authors, trial registers or other grey literature sources) with planned dates of coverage                                         | Y          |
| Search strategy                   | 10             | Present draft of search strategy to be used for at least one electronic database, including planned limits, such that it could be repeated                                                                                    | Y          |
| Study records:                    |                |                                                                                                                                                                                                                               |            |

| <i>Section and topic</i>           | <i>Item No</i> | <i>Checklist item</i>                                                                                                                                                                                                                                     | <i>Y/N</i> |
|------------------------------------|----------------|-----------------------------------------------------------------------------------------------------------------------------------------------------------------------------------------------------------------------------------------------------------|------------|
| Data management                    | 11a            | Describe the mechanism(s) that will be used to manage records and data throughout the review                                                                                                                                                              | Y          |
| Selection process                  | 11b            | State the process that will be used for selecting studies (such as two independent reviewers) through each phase of the review (that is, screening, eligibility and inclusion in meta-analysis)                                                           | Y          |
| Data collection process            | 11c            | Describe planned method of extracting data from reports (such as piloting forms, done independently, in duplicate), any processes for obtaining and confirming data from investigators                                                                    | Y          |
| Data items                         | 12             | List and define all variables for which data will be sought (such as PICO items, funding sources), any pre-planned data assumptions and simplifications                                                                                                   | Y          |
| Outcomes and prioritization        | 13             | List and define all outcomes for which data will be sought, including prioritization of main and additional outcomes, with rationale                                                                                                                      | Y          |
| Risk of bias in individual studies | 14             | Describe anticipated methods for assessing risk of bias of individual studies, including whether this will be done at the outcome or study level, or both; state how this information will be used in data synthesis                                      | Y          |
| Data synthesis                     | 15a            | Describe criteria under which study data will be quantitatively synthesised                                                                                                                                                                               | Y          |
|                                    | 15b            | If data are appropriate for quantitative synthesis, describe planned summary measures, methods of handling data and methods of combining data from studies, including any planned exploration of consistency (such as I <sup>2</sup> , Kendall's $\tau$ ) | n/a        |
|                                    | 15c            | Describe any proposed additional analyses (such as sensitivity or subgroup analyses, meta-regression)                                                                                                                                                     | n/a        |
|                                    | 15d            | If quantitative synthesis is not appropriate, describe the type of summary planned                                                                                                                                                                        | Y          |
| Meta-bias(es)                      | 16             | Specify any planned assessment of meta-bias(es) (such as publication bias across studies, selective reporting within studies)                                                                                                                             | Y          |
| Confidence in cumulative evidence  | 17             | Describe how the strength of the body of evidence will be assessed (such as GRADE)                                                                                                                                                                        | Y          |



Along with Medline we intend to search the following databases:

African Index Medicus (via WHO Global Health Index Medicus) all available years; Embase (Ovid) 1996 present; Global Health (Ovid) 1973 to present; Scopus (Elsevier B.V.) 1823 – Present; Web of Science Core Collection: Citation Indexes (Clarivate Analytics) 1900-present;. We will also search for grey literature and French articles in the following; Cairn International (Cairn Info) all available years; Erudit (University of Montreal ???) all available years; IRIS Institutional Repository for Information Sharing (WHO) all available years and World Bank Group Research and Publications

### Sample Medline strategy

Ovid MEDLINE(R) and Epub Ahead of Print, In-Process & Other Non-Indexed Citations and Daily <1946 to April 23, 2020>

Search Strategy:

- 
- 1 exp "Africa South of the Sahara"/ (205870)
  - 2 (angola\* or benin\* or botswana\* or "burkina faso" or burundi\*).ti,ab,in,kf. (17906)
  - 3 ("cabo verde\*" or "cape verde\*" or cameroon\* or "central africa\*" or chad or cormoros or congo\* or "ivory coast" or "cote d'ivoire" or djibouti).ti,ab,in,kf. (45277)
  - 4 (guinea\* or eritrea\* or eswatini\* or swaziland\* or ethiopia\* or gabon\* or gambia\* or ghana\* or guinea\*).ti,ab,in,kf. (158364)
  - 5 (kenya\* or lesotho\* or liberia\* or madagasca\* or malawi\* or mali or mauritania\* or mauritius or mozambique\*).ti,ab,in,kf. (55553)
  - 6 (namibia\* or niger or nigeria\* or rwanda\*).ti,ab,in,kf. (67659)
  - 7 ("sao tome" or principe\* or senegal\* or seychelles or "sierra leone\*" or somali\* or "south africa\*" or sudan\*).ti,ab,in,kf. (132358)
  - 8 (tanzania\* or togo\* or uganda\* or zambia\* or zaire\* or zimbabw\*).ti,ab,in,kf. (50798)
  - 9 (africa\* adj2 ("sub sahara\*" or "south\* sahara\*")).ti,ab,in,kf. (23957)
  - 10 or/1-9 [sub-saharan africa] (519682)
  - 11 Drug Costs/ (15924)
  - 12 ((price? or pricing) adj5 (medicine? or drug? or prescription? or pharmaceutical\*)).tw,kw. (4558)
  - 13 ((cost or costs) adj5 (medicine? or drug? or prescription? or pharmaceutical\*)).tw,kw. (18930)
  - 14 (afford\* adj5 (medicine? or drug? or prescription? or pharmaceutical\*)).tw,kw. (1929)
  - 15 (reimburs\* adj5 (medicine? or drug? or prescription? or pharmaceutical\*)).tw,kw. (2099)
  - 16 (generic\* adj5 (medicine? or drug? or prescription? or pharmaceutical\*)).tw,kw. (4521)
  - 17 exp fees, pharmaceutical/ (2413)



- 1  
2  
3 18 ((purchas\* or procur\* or expenditure\*) adj5 (medicine? or drug? or prescription? or  
4 pharmaceutical\*).tw,kw. (4913)  
5  
6 19 ((subsid\* or tariff\* or incentive\* or containment or transparency) adj5 (medicine? or drug? or  
7 prescription? or pharmaceutical\*).tw,kw. (2141)  
8  
9 20 ((fee or fees or rebate\* or payment\* or spend\* or saving\*) adj5 (medicine? or drug? or  
10 prescription? or pharmaceutical\*).tw,kw. (4006)  
11  
12 21 ((benchmark\* or cost-plus) adj12 (medicine? or drug? or prescription? or  
13 pharmaceutical\*).tw,kw. (641)  
14  
15 22 "low\* price\* generic\*".tw,kw. (76)  
16  
17 23 (essential adj2 (drug\* or medicine\*).tw,kw. (3434)  
18  
19 24 Drugs, Essential/ (835)  
20  
21 25 (access\* adj3 (medicine? or drug? or prescription? or pharmaceutical\*).tw,kw. (5991)  
22  
23 26 Economics, Pharmaceutical/ (2927)  
24  
25 27 (pharma\* adj2 economic\*).tw,kw. (833)  
26  
27 28 pharmaco-economic\*.tw,kw. (3898)  
28  
29 29 or/11-28 [drug pricing] (58841)  
30  
31 30 exp policy/ (155119)  
32  
33 31 Government Regulation/ (21073)  
34  
35 32 exp Legislation, Drug/ (32091)  
36  
37 33 ((drug\* or medicine\* or pharmaceutical\* or prescription\* or health\*) adj7 (guideline\* or  
38 guidance or policy or policies or law or regulat\* or rule\* or legislat\* or control\* or strateg\* or  
39 framework\*).tw,kw. (538082)  
40  
41 34 (tax or taxes or exemption\*).tw,kw. (17307)  
42  
43 35 ((drug\* or medicine\* or pharmaceutical\* or prescription\* or health\*) adj7 (intervention\* or  
44 plan\* or program\*).tw,kw. (256052)  
45  
46 36 or/30-35 [policy concept -all] (917754)  
47  
48 37 10 and 29 and 36 [SSA and policy ] (1190)  
49  
50 38 Health Plan Implementation/ (5829)  
51  
52 39 Program Evaluation/ (62240)  
53  
54 40 (barrier\* or facilitator\* or challenge\* or motivator\*).tw,kw. (923252)  
55  
56 41 (implement\* or approach\* or process\*).tw,kw. (3962356)  
57  
58 42 (factor\* or determinant\* or context\*).tw,kw. (3829825)  
59  
60 43 "scal\* up".tw,kw. (19228)

- 1  
2  
3 44 adopt\*.tw,kw. (243593)  
4  
5 45 or/38-44 [implementation] (7698904)  
6  
7 46 10 and 29 and 36 and 45 (763)  
8  
9 47 limit 46 to yr="2000 -Current" (652)  
10  
11  
12  
13  
14  
15  
16  
17  
18  
19  
20  
21  
22  
23  
24  
25  
26  
27  
28  
29  
30  
31  
32  
33  
34  
35  
36  
37  
38  
39  
40  
41  
42  
43  
44  
45  
46  
47  
48  
49  
50  
51  
52  
53  
54  
55  
56  
57  
58  
59  
60

For peer review only

## AMIPS project: Flowchart for screening of search results

1  
2  
3  
4  
5  
6  
7  
8  
9  
10  
11  
12  
13  
14  
15  
16  
17  
18  
19  
20  
21  
22  
23  
24  
25  
26  
27  
28  
29  
30  
31  
32  
33  
34  
35  
36  
37  
38  
39  
40  
41  
42  
43  
44  
45  
46  
47  
48  
49  
50  
51  
52  
53  
54  
55  
56  
57  
58  
59  
60

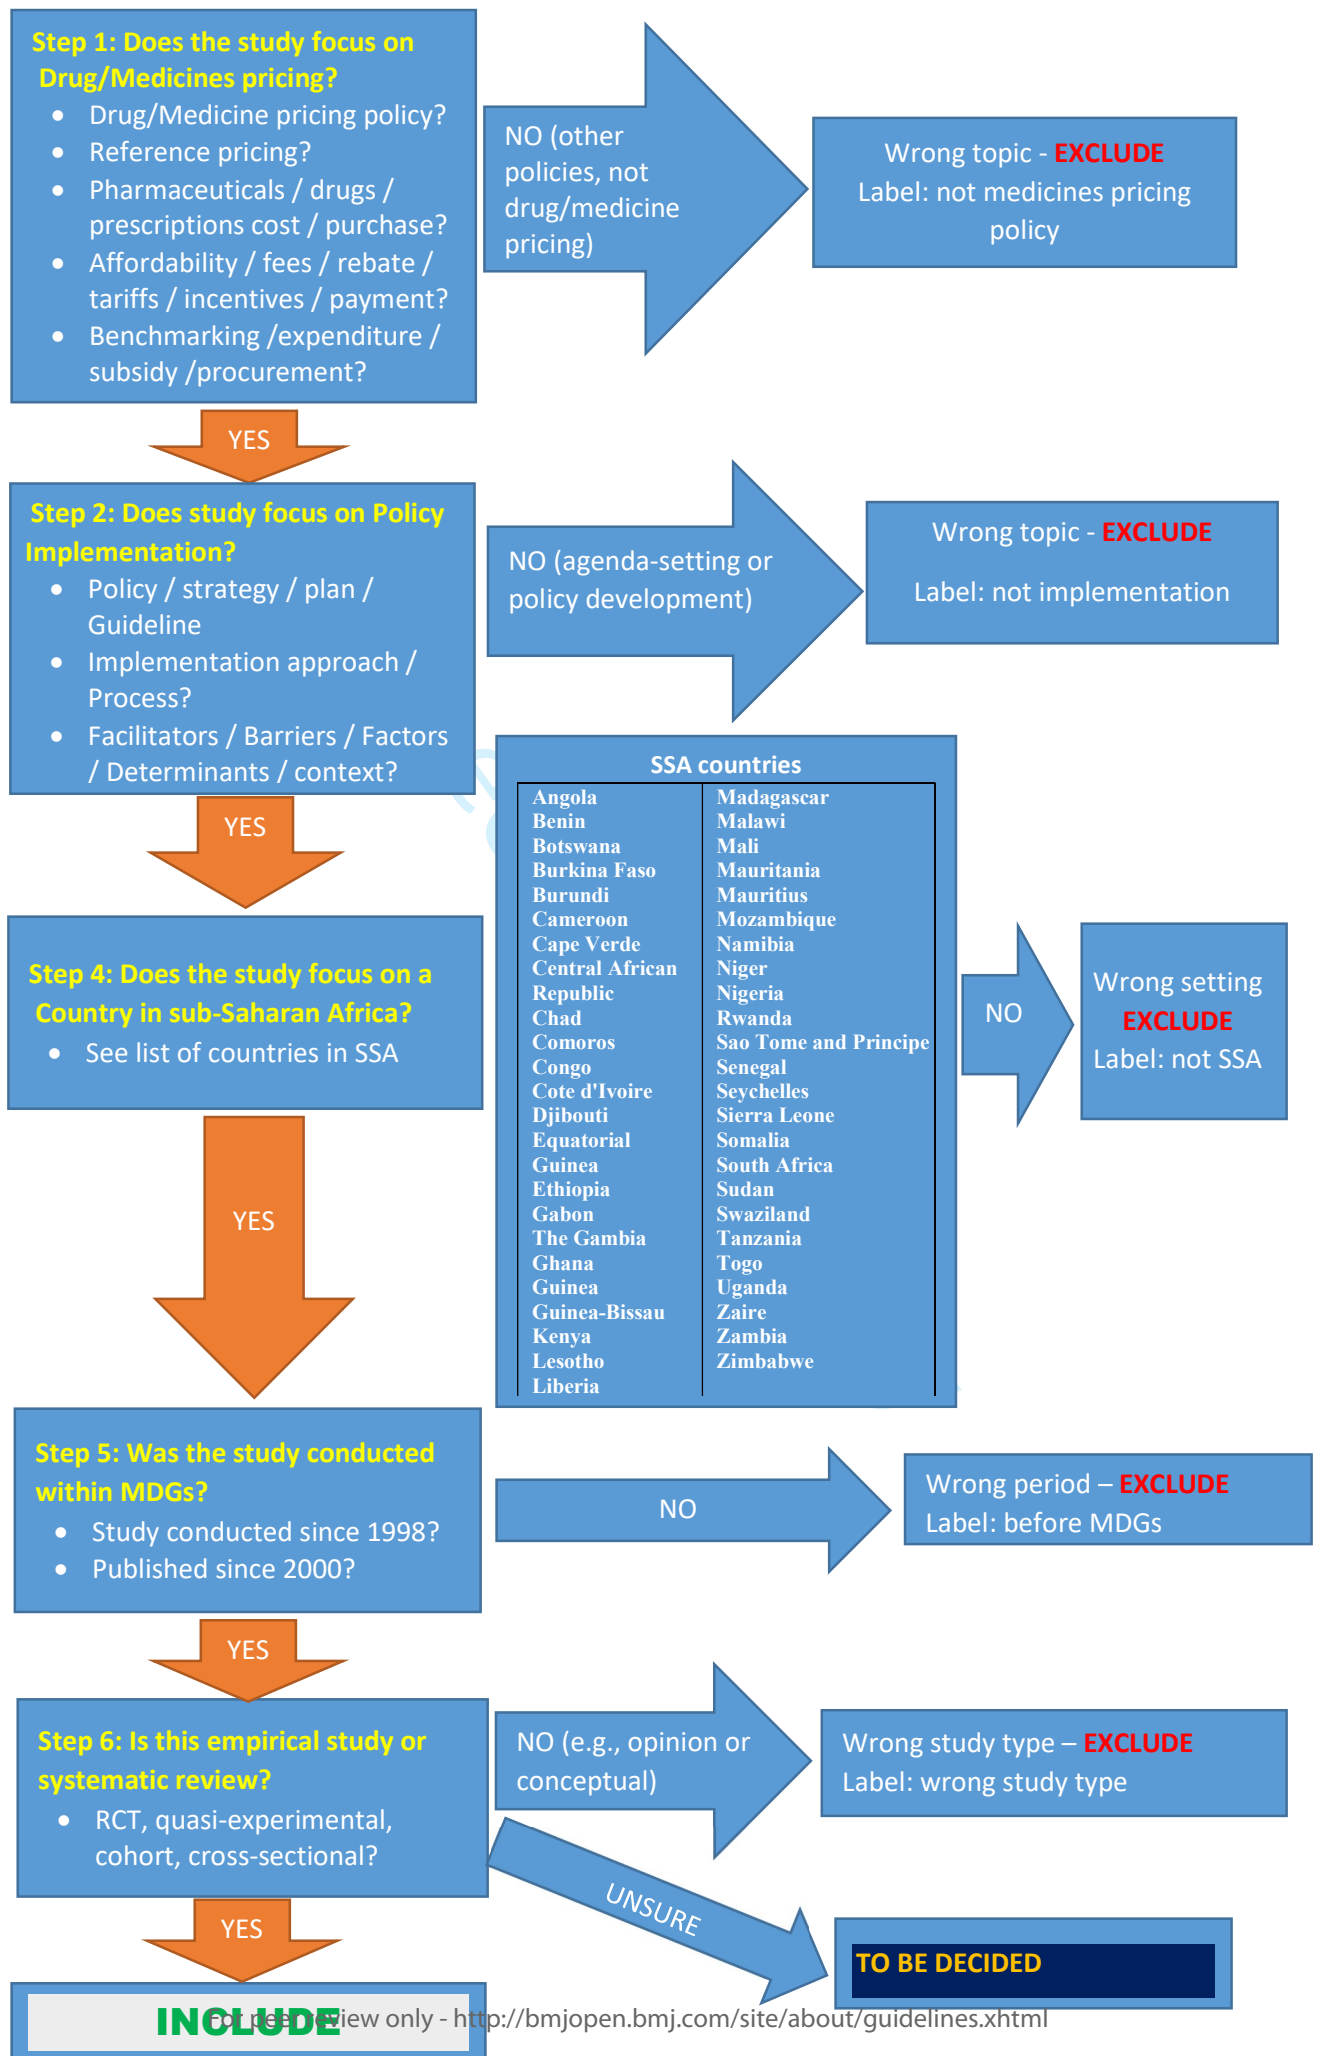

# BMJ Open

## Implementation of medicines pricing policies in sub-Saharan Africa: protocol for a systematic review

|                                 |                                                                                                                                                                                                                                                                                                                                                                                                                                                                                                                                                                                                                                                                                                                                                                                                    |
|---------------------------------|----------------------------------------------------------------------------------------------------------------------------------------------------------------------------------------------------------------------------------------------------------------------------------------------------------------------------------------------------------------------------------------------------------------------------------------------------------------------------------------------------------------------------------------------------------------------------------------------------------------------------------------------------------------------------------------------------------------------------------------------------------------------------------------------------|
| Journal:                        | <i>BMJ Open</i>                                                                                                                                                                                                                                                                                                                                                                                                                                                                                                                                                                                                                                                                                                                                                                                    |
| Manuscript ID                   | bmjopen-2020-044293.R1                                                                                                                                                                                                                                                                                                                                                                                                                                                                                                                                                                                                                                                                                                                                                                             |
| Article Type:                   | Protocol                                                                                                                                                                                                                                                                                                                                                                                                                                                                                                                                                                                                                                                                                                                                                                                           |
| Date Submitted by the Author:   | 12-Dec-2020                                                                                                                                                                                                                                                                                                                                                                                                                                                                                                                                                                                                                                                                                                                                                                                        |
| Complete List of Authors:       | Mirzoev, Tolib; University of Leeds, Nuffield Centre for International Health and Development<br>Koduah, Augustina ; University of Ghana, School of Pharmacy<br>Cronin de Chavez, Anna; University of Leeds, Nuffield Centre for International Health and Development<br>Baatiema, Leonard; University of Ghana, School of Pharmacy<br>Danso-Appiah, Anthony; University of Ghana, School of Public Health<br>Ensor, Tim; University of Leeds, Nuffield Centre for International Health and Development<br>Agyepong, Irene; Ghana Health Service, Research and Development Division<br>Wright, Judy; University of Leeds, Leeds Institute of Health Sciences<br>Kretchy, Irene ; University of Ghana, School of Pharmacy<br>King, Natalie; University of Leeds, Leeds Institute of Health Sciences |
| <b>Primary Subject Heading</b>: | Health policy                                                                                                                                                                                                                                                                                                                                                                                                                                                                                                                                                                                                                                                                                                                                                                                      |
| Secondary Subject Heading:      | Global health                                                                                                                                                                                                                                                                                                                                                                                                                                                                                                                                                                                                                                                                                                                                                                                      |
| Keywords:                       | Health policy < HEALTH SERVICES ADMINISTRATION & MANAGEMENT, International health services < HEALTH SERVICES ADMINISTRATION & MANAGEMENT, PUBLIC HEALTH                                                                                                                                                                                                                                                                                                                                                                                                                                                                                                                                                                                                                                            |
|                                 |                                                                                                                                                                                                                                                                                                                                                                                                                                                                                                                                                                                                                                                                                                                                                                                                    |

SCHOLARONE™  
Manuscripts



I, the Submitting Author has the right to grant and does grant on behalf of all authors of the Work (as defined in the below author licence), an exclusive licence and/or a non-exclusive licence for contributions from authors who are: i) UK Crown employees; ii) where BMJ has agreed a CC-BY licence shall apply, and/or iii) in accordance with the terms applicable for US Federal Government officers or employees acting as part of their official duties; on a worldwide, perpetual, irrevocable, royalty-free basis to BMJ Publishing Group Ltd ("BMJ") its licensees and where the relevant Journal is co-owned by BMJ to the co-owners of the Journal, to publish the Work in this journal and any other BMJ products and to exploit all rights, as set out in our [licence](#).

The Submitting Author accepts and understands that any supply made under these terms is made by BMJ to the Submitting Author unless you are acting as an employee on behalf of your employer or a postgraduate student of an affiliated institution which is paying any applicable article publishing charge ("APC") for Open Access articles. Where the Submitting Author wishes to make the Work available on an Open Access basis (and intends to pay the relevant APC), the terms of reuse of such Open Access shall be governed by a Creative Commons licence – details of these licences and which [Creative Commons](#) licence will apply to this Work are set out in our licence referred to above.

Other than as permitted in any relevant BMJ Author's Self Archiving Policies, I confirm this Work has not been accepted for publication elsewhere, is not being considered for publication elsewhere and does not duplicate material already published. I confirm all authors consent to publication of this Work and authorise the granting of this licence.

**Title:** Implementation of medicines pricing policies in sub-Saharan Africa: protocol for a systematic review

**Authors:**

- Professor Tolib Mirzoev\*, University of Leeds, Nuffield Centre for International Health and Development [t.mirzoev@leeds.ac.uk](mailto:t.mirzoev@leeds.ac.uk)
- Dr Augustina Koduah, University of Ghana, School of Pharmacy [akoduah@ug.edu.gh](mailto:akoduah@ug.edu.gh)
- Dr Anna Cronin de Chavez, University of Leeds, Nuffield Centre for International Health and Development [A.Chavez@leeds.ac.uk](mailto:A.Chavez@leeds.ac.uk)
- Dr Leonard Baatiema, University of Ghana, School of Pharmacy [baatiemaleonard@gmail.com](mailto:baatiemaleonard@gmail.com)
- Dr Anthony Danso-Appiah, University of Ghana, School of Public Health [adanso-appiah@ug.edu.gh](mailto:adanso-appiah@ug.edu.gh)
- Professor Tim Ensor, University of Leeds, Nuffield Centre for International Health and Development [T.R.A.Ensor@leeds.ac.uk](mailto:T.R.A.Ensor@leeds.ac.uk)
- Professor Irene Akua Agyepong, Ghana Health Service, Research and Development Division [irene.agyepong@gmail.com](mailto:irene.agyepong@gmail.com)
- Mrs Judy Wright, University of Leeds, Leeds Institute of Health Sciences [J.M.Wright@leeds.ac.uk](mailto:J.M.Wright@leeds.ac.uk)
- Dr Irene A Kretchy, University of Ghana, School of Pharmacy [ikretchy@ug.edu.gh](mailto:ikretchy@ug.edu.gh)
- Ms Natalie King, University of Leeds, Leeds Institute of Health Sciences [N.V.King@leeds.ac.uk](mailto:N.V.King@leeds.ac.uk)

\*Corresponding author: Nuffield Centre for International Health and Development, Level 10 Worsley Building, Clarendon Way, Leeds LS2 9NL. [t.mirzoev@leeds.ac.uk](mailto:t.mirzoev@leeds.ac.uk) +44(0)113-343-4869

**Keywords**

Systematic review; medicine pricing; policy implementation; sub-Saharan Africa; global health

**Word count**

2,228 words

## Abstract

### Introduction

Ensuring universal availability and accessibility of medicines and supplies is critical for national health systems to equitably address population health needs. In sub-Saharan Africa (SSA), this is a recognised priority with multiple medicines pricing policies enacted. However, medicine prices have remained high, continue to rise and constrain their accessibility. In this systematic review, we aim to identify and analyse experiences of implementation of medicines pricing policies in SSA. Our ambition is for this evidence to contribute to improved implementation of medicines pricing policies in SSA.

### Methods and analysis

We will search: Medline, Web of Science, Scopus, Global Health, Embase, Cairn.Info International Edition, Eruudit and African Index Medicus, the grey literature and reference from related publications. The searches will be limited to literature published from the year 2000 onwards i.e. since the start of the Millennium Development Goals.

Published peer-reviewed studies of implementation of medicines pricing policies in sub-Saharan Africa will be eligible for inclusion. Broader policy analyses and documented experiences of implementation of other health policies will be excluded. The team will collaboratively screen titles and abstracts, then two reviewers will independently screen full-texts, extract data and assess quality of the included studies. Disagreements will be resolved by discussion or a third reviewer. Data will be extracted on approaches used for policy implementation, actors involved, evidence used in decision-making and key contextual influences on policy implementation. A narrative approach will be used to synthesise the data. Reporting will be informed by the Preferred Reporting Items for Systematic Review and Meta-Analysis Protocols (PRISMA) guideline.

### Ethics and dissemination

No ethics approvals are required for systematic reviews.

Results will be disseminated through academic publications, policy briefs and presentations to national policymakers in Ghana and made widely across countries in SSA.

### Registration details

Prospero registration number: CRD42020178166, full record:

[https://www.crd.york.ac.uk/prospero/display\\_record.php?ID=CRD42020178166](https://www.crd.york.ac.uk/prospero/display_record.php?ID=CRD42020178166)

## Article summary

### ***Strengths and limitations of this study***

- This systematic review protocol follows the Preferred Reporting Items for Systematic Review and Meta-Analysis Protocols (PRISMA-P) guidelines;
- The review addresses a gap in the current knowledge of the determinants and outcomes of successful implementation of medicines pricing policies in sub-Saharan Africa;
- The focus on sub-Saharan Africa (SSA) will help with transferability of lessons across the different countries within the region, though this may lead to omission of important experiences for example from Asia and Latin America and may limit transferability of lessons outside the SSA;
- The search will be restricted to peer-reviewed published articles and grey literature, thus relevant theses and conference abstracts are likely to be omitted and may affect the depth of evidence on the topic;
- The narrative synthesis approach reflects the nature of published evidence on the topic of policy implementation with no meta-analysis possible, and is a potential limitation of this review.



## Introduction

The current agenda of Universal Health Coverage (UHC) highlights the importance of access to safe, quality and affordable medicines as its key driver.<sup>1-3</sup> Increasing access to essential medicines through medicines pricing interventions is an issue of current health policy discourses.<sup>4,5</sup> In response, various policy initiatives have evolved to regulate medicine pricing and improve access.

Globally, different medicine pricing models and strategies exist. These include: generic or biosimilar price linking to originator products, non-proprietary prescribing and generic substitutions, tendering and pooled procurements, internal reference pricing, external price referencing or international price comparisons, and managed-entry agreements.<sup>6-8</sup> Implementation of these medicine pricing policies may be dependent on in-country manufacturing capacity, pricing levels of the medicines, whether medicines are generic or branded, and whether medicines are for out-patient or in-patient services.<sup>9</sup>

Many of these medicine pricing policies are being implemented in high-income countries. However, unlike in high-income countries, low and middle-income countries (LMICs) have less regulated and developed pharmaceutical markets and have different challenges in distribution and production.<sup>1</sup> In light of this, multiple medicine pricing models and strategies are required to achieve equitable access to safe, quality and affordable medicines<sup>10</sup>, particularly in sub-Saharan African countries (SSA).<sup>10</sup>

## Rationale

Ensuring availability and accessibility of medicines is an important mechanism by which national health systems can equitably address health needs of their populations, including the poorest and the most vulnerable. In SSA, this is a recognised policy priority. For example, in the last two decades different medicines pricing policies were implemented in South Africa<sup>11,12</sup> and between 2012 and 2017, the Government of Ghana introduced four policies to improve access to medicines through medicine price regulation, and ultimately health outcomes and quality of life. These policies are currently at different stages of their implementation and despite these efforts, medicine prices have remained high and continue to rise, making them inaccessible to a large proportion of populations.. This raises questions as to why and how these policies are failing to achieve the desired outcomes.

In this systematic review, we will explore the effectiveness of implementation of medicines pricing policies in the sub-Saharan African context. We want to identify which policies have been implemented and then explore three broad dimensions of their implementation. First, we want to understand *what happened* i.e. identify evidence on effective implementations of medicines pricing policies reflected in a reduction in prices and improvement in access to medicines and subsequently healthcare. Second, we want to understand *how it happened* i.e. we want to identify and unpack the implementation processes and approaches deployed in terms of their timing, participation of actors and role of evidence. Third, we want to understand *why it happened*. We want to identify and synthesise key reported facilitators and barriers to the implementation and understand how they affected the implementation of these policies within their respective contexts.

## ***Aim and objectives***

In this systematic review we will address the following overall question: what are the key determinants of implementation of medicines pricing policies in sub-Saharan African (SSA) countries? More specifically, we will answer four questions:

- a. Which medicines pricing policies have been implemented in SSA and what are their key elements?
- b. How have these policies been implemented (in relation to implementation approaches, processes, involvement of actors, role of evidence etc)?
- c. Which key facilitators and barriers affected the implementation of medicines pricing policies, and how?
- d. Which implementation of medicines pricing policies in SSA are effective (in relation to reducing prices of medicines and improving access to services)?

This review is being undertaken during April 2020 – May 2021 as part of the project on ‘Improving equitable access to essential medicines in Ghana through bridging the gaps in implementing medicines pricing policy’ (AMIPS) – a NIHR-funded award received jointly by the University of Leeds, University of Ghana and the Ghana Health Service. The results of this review will be combined with results of policy analyses in Ghana and will inform engagements with key stakeholders on improving the implementation of the current policies and identification of future research and development priorities. Our ambition is for evidence from this review to contribute to improved implementation of medicines pricing policies across countries of SSA.

This protocol follows the Preferred reporting items for systematic review and meta-analysis protocols (PRISMA-P) guidelines<sup>13</sup> and a PRISMA-P checklist is available as a supplementary file.

## **Methods and analysis**

### ***Eligibility criteria***

#### **Studies**

We will include empirical studies including Randomised Controlled Trials (RCTs), quasi-experimental studies and cohort and cross-sectional studies. Reviews (scoping reviews, meta-syntheses, realist syntheses) will also be included and individual primary studies from the systematic reviews will be manually included as empirical literature. We will exclude opinion pieces and conceptual/theoretical publications which do not report documented empirical data from either primary studies or reviews.

Specific inclusion criteria will be: (a) focus on the medicines pricing policies i.e. policies, strategies, interventions or plans which aim to improve affordability of medicines in the country. The link to improvements in access to healthcare may be implicit and is not a requirement; (b) focus on policy implementation i.e. either as part of the whole policy process (agenda-setting, development, implementation) or as an exclusive focus; (c) sub-Saharan African country contexts i.e. either as part of the comparative studies or as a sole focus; (d) studies which were published since the agenda of Millennium Development Goals was initiated shortly before 2000; and (e) papers with relevant information available for analysis.

Specific exclusion criteria are: (a) policy analyses which focus solely on policy agenda-setting and development stages of the policy process; (b) studies from high-income country contexts and outside sub-Saharan Africa; (c) studies conducted two years or more prior to 2000 but published after 2000, will be excluded in consideration of MDG and SDG agenda which started in 2000; (d)

1  
2  
3 papers in languages where we are unable to have the resources for translation (the team has access  
4 to French, Spanish and Russian-speaking researchers) and (e) papers with no full text available for  
5 analysis.  
6

## 7 8 **Participants**

9  
10 The participants to be covered in this review will be: policymakers, implementers, service providers,  
11 patients and beneficiaries of successful implementation of medicines pricing policies (of any gender,  
12 age, ethnicity, socio-economic group, health status or urban-rural residence).  
13

## 14 15 **Interventions**

16  
17 Implementation of medicines pricing policies i.e. policies, strategies, interventions or plans which  
18 aim to improve affordability of medicines in the country.  
19

## 20 21 **Comparison**

22  
23 No comparison or control is applicable to this study  
24

## 25 26 **Outcomes**

27  
28 Successful implementation will be measured as reduction in medicines prices, and improved access  
29 to medicines along the supply chain. Any studies describing unsuccessful implementation will also be  
30 used to inform the lessons learned.  
31

## 32 33 **Study records**

### 34 35 **Searches**

36  
37 We will search the following databases: Medline (1946 – present), Web of Science (1990 – present),  
38 Scopus (1823 – present), Global Health (1973 – present), Embase (1947 – present), Cairn.Info  
39 International Edition (all available years), Erudit (all available years) and African Index Medicus (all  
40 available years). The Medline search strategy is available as a supplementary file. The search  
41 strategies will incorporate index terms (MeSH) and text words for the search concepts:  
42

- 43 1. Sub-Saharan African Countries. This will include terms/synonyms for sub-Saharan Africa AND list  
44 of individual countries in the region
- 45 2. Drug/Medicines pricing. This will include terms/synonyms for: medicines / pharmaceuticals /  
46 drugs / prescriptions AND pricing / cost / affordability / fees / purchase / rebate(s) / tariffs /  
47 incentives / benchmarking / reference pricing / payment / spend\* / expenditure / subsid\* /  
48 procurement
- 49 3. Policy. This will include terms/synonyms for: policy / strategy / plan / framework / regulations /  
50 guidelines / rules / intervention / tax / exemption
- 51 4. Implementation. This will include terms / synonyms for: Implementing / Implement(s) /  
52 Implementation approach(es) / Process(es) / Facilitator(s) / Barrier(s) / Factors / Determinants /  
53 context  
54

55  
56 The searches will be limited to the literature published from the year 2000 and onwards. This is in  
57 consideration of the Millennium Development Goals agenda which started in 2000 with a clear focus  
58 on improving access to medicines and services. We will follow-up on the references to the individual  
59 studies as required. We will manually search for the included references in relevant retrieved  
60 reviews (systematic reviews, scoping reviews, meta-syntheses, realist syntheses) for additional

1  
2  
3 relevant studies for inclusion. In addition, we will search grey literature including global  
4 development websites: WHO IRIS, World Bank, DFID/K4D repository, Gates Foundation and contacts  
5 with experts in the field.  
6

### 7 **Data management**

8  
9  
10 We will upload all references identified through searches (electronic database and additional  
11 searches) into Endnote version X9. Once duplicates are removed, the remaining references will be  
12 exported into Rayyan (<https://rayyan.qcri.org/welcome>), an online free systematic review tool for  
13 screening.  
14

### 15 **Screening**

16  
17  
18 Titles and abstracts will be divided up across the review team and screened individually for eligibility  
19 using pre-specified eligibility criteria flowchart, which is available in a supplementary file. At least  
20 20% of individually reviewed titles and abstracts will then be cross-checked by at least two members  
21 of the team. Full texts will be obtained for all the potentially relevant studies and screened by two  
22 members of the team independently, and disagreements will be resolved through discussion. Where  
23 necessary, a third member of the team will engage to help resolve disagreements.  
24

### 25 **Data extraction**

26  
27  
28 The following data will be extracted by two members of the review team into an appropriate data  
29 extraction form:  
30

- 31 • article information (full citation, year study was conducted, study type, setting / country);
- 32 • medicine pricing policies studied (including which key elements the policies included);
- 33 • documented effects on prices of medicines (including how identified and reported);
- 34 • effects on access to medicines (including how identified and reported);
- 35 • effects on access to healthcare (including how identified and reported);
- 36 • implementation approach (including processes, actors involved and their roles and evidence  
37 used to inform implementation);
- 38 • key influences on policy implementation (including facilitators and constraints and how they  
39 affected implementation).  
40  
41

### 42 **Quality assessment and risk of bias**

43  
44  
45 Quality of each included study will be appraised. We will utilise validated quality assessment tools  
46 and the critical appraisal tools for relevant studies (qualitative and quantitative research) from the  
47 Joanna Briggs Institute [https://joannabriggs.org/ebp/critical\\_appraisal\\_tools](https://joannabriggs.org/ebp/critical_appraisal_tools). While at this point, we  
48 do not intend to change the actual criteria, the interpretation and application of the tools will be  
49 within the context of our study which focuses on key determinants of effective implementation of  
50 medicines pricing policies in SSA context. For example, clarity of focus will be assessed in relation to  
51 how the different aspects of policy implementation (processes, use of evidence, involvement of  
52 actors) are identified and consistently used in the reviewed papers.  
53

54  
55 A careful assessment of risk of bias in the included studies will be performed by two reviewers, who  
56 will first independently assess the quality of each study against each criterion. Results will be shared  
57 and agreed, and any disagreements will be addressed through engaging a third reviewer.  
58  
59  
60

## ***Data synthesis and interpretation***

### **Strategy for data synthesis.**

The main outcome in our study is the medicine pricing policy implementation. Policy implementation is typically done within a single country, but where the same policy is implemented in different countries, the analysis will take the specific context of the country into consideration.

In exploring the policy implementation, we will employ established policy theories and frameworks such as Walt and Gilson's policy triangle<sup>14</sup>, Baumgartner's punctuated equilibrium<sup>15</sup> and Lipsky's street-level bureaucracy<sup>16</sup>, and will also draw upon further theories and frameworks developed or adapted within the reviewed papers.

Where possible, we will compare the effects of the policies in a quantitative synthesis. We anticipate, however, that the heterogeneity of reporting of outcomes and of context may make it impossible to conduct a meta-analysis. In such a situation we will focus on narrative synthesis.

Whilst using qualitative or narrative synthesis approach<sup>17</sup>, data related to the medicines pricing policies will be extracted from the Introduction, Methods and possibly Results sections. Data on the effects of policy implementation and the policy implementation approaches, and key influences will be extracted from the Results and Discussion sections. Extracted data will be analysed thematically and will be structured around the specific questions of the review.

The interpretation of the results will follow the identified themes for each review question. For example, in answering the third review question we will divide the factors into facilitators and constraints and potentially will further sub-divide them by their nature (e.g. community issues, health systems issues, wider socio-economic influences).

At the moment, we are not planning analysis of sub-groups or sub-sets. However, depending on the breadth of extracted data we may consider sub-groups such as geographical region (West Africa, East Africa, Southern Africa), setting (urban, rural) or categories of implementers (health facilities, pharmacies).

### ***Patient and public involvement***

No patient involved.

## **Ethics and dissemination**

Ethics approvals are not required for systematic reviews. However, ethics approvals for the wider AMIPS study within which this review is being undertaken have been granted by the ethics committees from the Ghana Health Service (ref GHS-ERC006/02/20) and the University of Leeds School of Medicine (ref MREC 19-060).

We will disseminate results through academic papers and stakeholder workshops in Ghana and other SSA countries where possible. In Ghana, the review results will be complemented by reviews of policy documents. The findings of this review will also be presented at scientific conferences such as the biannual Global Symposia on Health Systems Research and Thematic Working Groups of the Health Systems Global.

The results of this review will inform empirical investigations of implementation of medicines pricing policies in Ghana through the in-depth interviews and focus groups, and engagements and

1  
2  
3 consultations with policymakers on seeking ways of further improving the implementation of  
4 medicines pricing policies in Ghana.  
5  
6

---

## 7 8 9 **Authors' contributions**

10  
11  
12 AK and TM jointly conceived the study; TM, AK, AC, LB, ADA, TE, IA, JW, IK, NK contributed to the  
13 review design and jointly wrote the protocol; TM, AK, AC, LB, ADA, TE, IA, JW, IK, NK read and  
14 approved the final version of the manuscript. AK and TM will be the guarantors of the review.  
15  
16

## 17 18 19 **Funding**

20  
21 This research was commissioned by the National Institute for Health Research (NIHR) NIHR Global  
22 Health Policy and Systems Research Development Award using UK aid from the UK Government  
23 (grant number 130219). The views expressed in this publication are those of the author(s) and not  
24 necessarily those of the NIHR or the Department of Health and Social Care  
25  
26

## 27 28 29 **Competing interests**

30  
31 None declared  
32  
33

---

## 34 35 36 **References**

- 37  
38 1. Bigdeli M, Laing R, Tomson G. Medicines and universal health coverage: challenges and  
39 opportunities: BioMed Central, 2015. 1-3  
40 2. Ghebreyesus TA. All roads lead to universal health coverage. *The Lancet Global Health*  
41 2017;5(9):e839-e40.  
42 3. Wirtz VJ, Hogerzeil HV, Gray AL, et al. Essential medicines for universal health coverage. *The*  
43 *Lancet* 2017;389(10067):403-76.  
44 4. World Health O, Regional Office for E. Access to new medicines in Europe : technical review of  
45 policy initiatives and opportunities for collaboration and research. 2015  
46 5. World Health Organization. Assessment of medicine pricing and reimbursement systems in health  
47 insurance schemes. 2016  
48 6. Bashaar M, Hassali F, ALrasheedy A, et al. Efficacy of international approaches to medicine price  
49 regulation and control: A scoping review. *J Appl Pharm Sci* 2017;7(04):227-41.  
50 7. Leopold C, Vogler S, Mantel-Teeuwisse AK, et al. Differences in external price referencing in  
51 Europe—a descriptive overview. *Health Policy* 2012;104(1):50-60.  
52 8. Vogler S, Paris V, Ferrario A, et al. How can pricing and reimbursement policies improve affordable  
53 access to medicines? Lessons learned from European countries. *Applied health economics*  
54 *and health policy* 2017;15(3):307-21.  
55 9. Vogler S, Zimmermann N, de Joncheere K. Policy interventions related to medicines: Survey of  
56 measures taken in European countries during 2010–2015. *Health Policy* 2016;120(12):1363-  
57 77.  
58  
59  
60

10. Nguyen TA, Knight R, Roughead EE, et al. Policy options for pharmaceutical pricing and purchasing: issues for low-and middle-income countries. *Health policy and planning* 2015;30(2):267-80.
11. Moodley R, Suleman F. Evaluating the impact of the single exit price policy on a basket of originator medicines in South Africa from 1999 to 2014 using a time series analysis. *BMC Health Services Research* 2019;19(1):576. doi: 10.1186/s12913-019-4403-8
12. Steyn R, Burger JR, Serfontein JHP, et al. Influence of a new reference-based pricing system in South Africa on the prevalence and cost of antidiabetic medicine: a pilot study. *International Journal of Pharmacy Practice* 2007;15(4):307-11. doi: 10.1211/ijpp.15.4.0009
13. Shamseer L, Moher D, Clarke M, et al. Preferred reporting items for systematic review and meta-analysis protocols (PRISMA-P) 2015: elaboration and explanation. *BMJ : British Medical Journal* 2015;349:g7647. doi: 10.1136/bmj.g7647
14. Walt G, Gilson L. Reforming the health sector in developing countries: the central role of policy analysis. *Health Policy Plan* 1994;9(4):353-70.
15. Baumgartner F, Jones B. Agendas and Instability in American Politics. Chicago, London: University of Chicago Press 1993.
16. Lipsky M. Street-level bureaucracy: dilemmas of the individual in public services New York: Russel Sage Foundation 1980.
17. Snilstveit B, Oliver S, Vojtkova M. Narrative approaches to systematic review and synthesis of evidence for international development policy and practice. *Journal of Development Effectiveness* 2012;4(3):409-29. doi: 10.1080/19439342.2012.710641



**Title:** Implementation of medicines pricing policies in sub-Saharan Africa: protocol for a systematic review

PRISMA-P (preferred reporting items for systematic review and meta-analysis protocols) 2015 checklist: recommended items to address in a systematic review protocol

| <i>Section and topic</i>          | <i>Item No</i> | <i>Checklist item</i>                                                                                                                                                                                                         | <i>Y/N</i> |
|-----------------------------------|----------------|-------------------------------------------------------------------------------------------------------------------------------------------------------------------------------------------------------------------------------|------------|
| <b>Administrative information</b> |                |                                                                                                                                                                                                                               |            |
| Title:                            |                |                                                                                                                                                                                                                               |            |
| Identification                    | 1a             | Identify the report as a protocol of a systematic review                                                                                                                                                                      | Y          |
| Update                            | 1b             | If the protocol is for an update of a previous systematic review, identify as such                                                                                                                                            | Y          |
| Registration                      | 2              | If registered, provide the name of the registry (such as PROSPERO) and registration number                                                                                                                                    | Y          |
| Authors:                          |                |                                                                                                                                                                                                                               |            |
| Contact                           | 3a             | Provide name, institutional affiliation, e-mail address of all protocol authors; provide physical mailing address of corresponding author                                                                                     | Y          |
| Contributions                     | 3b             | Describe contributions of protocol authors and identify the guarantor of the review                                                                                                                                           | Y          |
| Amendments                        | 4              | If the protocol represents an amendment of a previously completed or published protocol, identify as such and list changes; otherwise, state plan for documenting important protocol amendments                               | n/a        |
| Support:                          |                |                                                                                                                                                                                                                               |            |
| Sources                           | 5a             | Indicate sources of financial or other support for the review                                                                                                                                                                 | Y          |
| Sponsor                           | 5b             | Provide name for the review funder and/or sponsor                                                                                                                                                                             | Y          |
| Role of sponsor or funder         | 5c             | Describe roles of funder(s), sponsor(s), and/or institution(s), if any, in developing the protocol                                                                                                                            | Y          |
| <b>Introduction</b>               |                |                                                                                                                                                                                                                               |            |
| Rationale                         | 6              | Describe the rationale for the review in the context of what is already known                                                                                                                                                 | Y          |
| Objectives                        | 7              | Provide an explicit statement of the question(s) the review will address with reference to participants, interventions, comparators, and outcomes (PICO)                                                                      | Y          |
| <b>Methods</b>                    |                |                                                                                                                                                                                                                               |            |
| Eligibility criteria              | 8              | Specify the study characteristics (such as PICO, study design, setting, time frame) and report characteristics (such as years considered, language, publication status) to be used as criteria for eligibility for the review | Y          |
| Information sources               | 9              | Describe all intended information sources (such as electronic databases, contact with study authors, trial registers or other grey literature sources) with planned dates of coverage                                         | Y          |
| Search strategy                   | 10             | Present draft of search strategy to be used for at least one electronic database, including planned limits, such that it could be repeated                                                                                    | Y          |
| Study records:                    |                |                                                                                                                                                                                                                               |            |



| <i>Section and topic</i>           | <i>Item No</i> | <i>Checklist item</i>                                                                                                                                                                                                                                     | <i>Y/N</i> |
|------------------------------------|----------------|-----------------------------------------------------------------------------------------------------------------------------------------------------------------------------------------------------------------------------------------------------------|------------|
| Data management                    | 11a            | Describe the mechanism(s) that will be used to manage records and data throughout the review                                                                                                                                                              | Y          |
| Selection process                  | 11b            | State the process that will be used for selecting studies (such as two independent reviewers) through each phase of the review (that is, screening, eligibility and inclusion in meta-analysis)                                                           | Y          |
| Data collection process            | 11c            | Describe planned method of extracting data from reports (such as piloting forms, done independently, in duplicate), any processes for obtaining and confirming data from investigators                                                                    | Y          |
| Data items                         | 12             | List and define all variables for which data will be sought (such as PICO items, funding sources), any pre-planned data assumptions and simplifications                                                                                                   | Y          |
| Outcomes and prioritization        | 13             | List and define all outcomes for which data will be sought, including prioritization of main and additional outcomes, with rationale                                                                                                                      | Y          |
| Risk of bias in individual studies | 14             | Describe anticipated methods for assessing risk of bias of individual studies, including whether this will be done at the outcome or study level, or both; state how this information will be used in data synthesis                                      | Y          |
| Data synthesis                     | 15a            | Describe criteria under which study data will be quantitatively synthesised                                                                                                                                                                               | Y          |
|                                    | 15b            | If data are appropriate for quantitative synthesis, describe planned summary measures, methods of handling data and methods of combining data from studies, including any planned exploration of consistency (such as I <sup>2</sup> , Kendall's $\tau$ ) | n/a        |
|                                    | 15c            | Describe any proposed additional analyses (such as sensitivity or subgroup analyses, meta-regression)                                                                                                                                                     | n/a        |
|                                    | 15d            | If quantitative synthesis is not appropriate, describe the type of summary planned                                                                                                                                                                        | Y          |
| Meta-bias(es)                      | 16             | Specify any planned assessment of meta-bias(es) (such as publication bias across studies, selective reporting within studies)                                                                                                                             | Y          |
| Confidence in cumulative evidence  | 17             | Describe how the strength of the body of evidence will be assessed (such as GRADE)                                                                                                                                                                        | Y          |

Along with Medline we intend to search the following databases:

African Index Medicus (via WHO Global Health Index Medicus) all available years; Embase (Ovid) 1996 present; Global Health (Ovid) 1973 to present; Scopus (Elsevier B.V.) 1823 – Present; Web of Science Core Collection: Citation Indexes (Clarivate Analytics) 1900-present;. We will also search for grey literature and French articles in the following; Cairn International (Cairn Info) all available years; Erudit (University of Montreal ???) all available years; IRIS Institutional Repository for Information Sharing (WHO) all available years and World Bank Group Research and Publications

### Sample Medline strategy

Ovid MEDLINE(R) and Epub Ahead of Print, In-Process & Other Non-Indexed Citations and Daily <1946 to April 23, 2020>

Search Strategy:

- 
- 1 exp "Africa South of the Sahara"/ (205870)
  - 2 (angola\* or benin\* or botswana\* or "burkina faso" or burundi\*).ti,ab,in,kf. (17906)
  - 3 ("cabo verde\*" or "cape verde\*" or cameroon\* or "central africa\*" or chad or cormoros or congo\* or "ivory coast" or "cote d'ivoire" or djibouti).ti,ab,in,kf. (45277)
  - 4 (guinea\* or eritrea\* or eswatini\* or swaziland\* or ethiopia\* or gabon\* or gambia\* or ghana\* or guinea\*).ti,ab,in,kf. (158364)
  - 5 (kenya\* or lesotho\* or liberia\* or madagasca\* or malawi\* or mali or mauritania\* or mauritius or mozambique\*).ti,ab,in,kf. (55553)
  - 6 (namibia\* or niger or nigeria\* or rwanada\*).ti,ab,in,kf. (67659)
  - 7 ("sao tome" or principe\* or senegal\* or seychelles or "sierra leone\*" or somali\* or "south africa\*" or sudan\*).ti,ab,in,kf. (132358)
  - 8 (tanzania\* or togo\* or uganda\* or zambia\* or zaire\* or zimbabw\*).ti,ab,in,kf. (50798)
  - 9 (africa\* adj2 ("sub sahara\*" or "south\* sahara\*")).ti,ab,in,kf. (23957)
  - 10 or/1-9 [sub-saharan africa] (519682)
  - 11 Drug Costs/ (15924)
  - 12 ((price? or pricing) adj5 (medicine? or drug? or prescription? or pharmaceutical\*)).tw,kw. (4558)
  - 13 ((cost or costs) adj5 (medicine? or drug? or prescription? or pharmaceutical\*)).tw,kw. (18930)
  - 14 (afford\* adj5 (medicine? or drug? or prescription? or pharmaceutical\*)).tw,kw. (1929)
  - 15 (reimburs\* adj5 (medicine? or drug? or prescription? or pharmaceutical\*)).tw,kw. (2099)
  - 16 (generic\* adj5 (medicine? or drug? or prescription? or pharmaceutical\*)).tw,kw. (4521)
  - 17 exp fees, pharmaceutical/ (2413)

- 1  
2  
3 18 ((purchas\* or procur\* or expenditure\*) adj5 (medicine? or drug? or prescription? or  
4 pharmaceutical\*).tw,kw. (4913)  
5  
6 19 ((subsid\* or tariff\* or incentive\* or containment or transparency) adj5 (medicine? or drug? or  
7 prescription? or pharmaceutical\*).tw,kw. (2141)  
8  
9 20 ((fee or fees or rebate\* or payment\* or spend\* or saving\*) adj5 (medicine? or drug? or  
10 prescription? or pharmaceutical\*).tw,kw. (4006)  
11  
12 21 ((benchmark\* or cost-plus) adj12 (medicine? or drug? or prescription? or  
13 pharmaceutical\*).tw,kw. (641)  
14  
15 22 "low\* price\* generic\*".tw,kw. (76)  
16  
17 23 (essential adj2 (drug\* or medicine\*).tw,kw. (3434)  
18  
19 24 Drugs, Essential/ (835)  
20  
21 25 (access\* adj3 (medicine? or drug? or prescription? or pharmaceutical\*).tw,kw. (5991)  
22  
23 26 Economics, Pharmaceutical/ (2927)  
24  
25 27 (pharma\* adj2 economic\*).tw,kw. (833)  
26  
27 28 pharmaco-economic\*.tw,kw. (3898)  
28  
29 29 or/11-28 [drug pricing] (58841)  
30  
31 30 exp policy/ (155119)  
32  
33 31 Government Regulation/ (21073)  
34  
35 32 exp Legislation, Drug/ (32091)  
36  
37 33 ((drug\* or medicine\* or pharmaceutical\* or prescription\* or health\*) adj7 (guideline\* or  
38 guidance or policy or policies or law or regulat\* or rule\* or legislat\* or control\* or strateg\* or  
39 framework\*).tw,kw. (538082)  
40  
41 34 (tax or taxes or exemption\*).tw,kw. (17307)  
42  
43 35 ((drug\* or medicine\* or pharmaceutical\* or prescription\* or health\*) adj7 (intervention\* or  
44 plan\* or program\*).tw,kw. (256052)  
45  
46 36 or/30-35 [policy concept -all] (917754)  
47  
48 37 10 and 29 and 36 [SSA and policy ] (1190)  
49  
50 38 Health Plan Implementation/ (5829)  
51  
52 39 Program Evaluation/ (62240)  
53  
54 40 (barrier\* or facilitator\* or challenge\* or motivator\*).tw,kw. (923252)  
55  
56 41 (implement\* or approach\* or process\*).tw,kw. (3962356)  
57  
58 42 (factor\* or determinant\* or context\*).tw,kw. (3829825)  
59  
60 43 "scal\* up".tw,kw. (19228)

- 1  
2  
3 44 adopt\*.tw,kw. (243593)  
4  
5 45 or/38-44 [implementation] (7698904)  
6  
7 46 10 and 29 and 36 and 45 (763)  
8  
9 47 limit 46 to yr="2000 -Current" (652)  
10  
11  
12  
13  
14  
15  
16  
17  
18  
19  
20  
21  
22  
23  
24  
25  
26  
27  
28  
29  
30  
31  
32  
33  
34  
35  
36  
37  
38  
39  
40  
41  
42  
43  
44  
45  
46  
47  
48  
49  
50  
51  
52  
53  
54  
55  
56  
57  
58  
59  
60

For peer review only

## AMIPS project: Flowchart for screening of search results

1  
2  
3  
4  
5  
6  
7  
8  
9  
10  
11  
12  
13  
14  
15  
16  
17  
18  
19  
20  
21  
22  
23  
24  
25  
26  
27  
28  
29  
30  
31  
32  
33  
34  
35  
36  
37  
38  
39  
40  
41  
42  
43  
44  
45  
46  
47  
48  
49  
50  
51  
52  
53  
54  
55  
56  
57  
58  
59  
60



# BMJ Open

## Implementation of medicines pricing policies in sub-Saharan Africa: protocol for a systematic review

|                                 |                                                                                                                                                                                                                                                                                                                                                                                                                                                                                                                                                                                                                                                                                                                                                                                                    |
|---------------------------------|----------------------------------------------------------------------------------------------------------------------------------------------------------------------------------------------------------------------------------------------------------------------------------------------------------------------------------------------------------------------------------------------------------------------------------------------------------------------------------------------------------------------------------------------------------------------------------------------------------------------------------------------------------------------------------------------------------------------------------------------------------------------------------------------------|
| Journal:                        | <i>BMJ Open</i>                                                                                                                                                                                                                                                                                                                                                                                                                                                                                                                                                                                                                                                                                                                                                                                    |
| Manuscript ID                   | bmjopen-2020-044293.R2                                                                                                                                                                                                                                                                                                                                                                                                                                                                                                                                                                                                                                                                                                                                                                             |
| Article Type:                   | Protocol                                                                                                                                                                                                                                                                                                                                                                                                                                                                                                                                                                                                                                                                                                                                                                                           |
| Date Submitted by the Author:   | 16-Jan-2021                                                                                                                                                                                                                                                                                                                                                                                                                                                                                                                                                                                                                                                                                                                                                                                        |
| Complete List of Authors:       | Mirzoev, Tolib; University of Leeds, Nuffield Centre for International Health and Development<br>Koduah, Augustina ; University of Ghana, School of Pharmacy<br>Cronin de Chavez, Anna; University of Leeds, Nuffield Centre for International Health and Development<br>Baatiema, Leonard; University of Ghana, School of Pharmacy<br>Danso-Appiah, Anthony; University of Ghana, School of Public Health<br>Ensor, Tim; University of Leeds, Nuffield Centre for International Health and Development<br>Agyepong, Irene; Ghana Health Service, Research and Development Division<br>Wright, Judy; University of Leeds, Leeds Institute of Health Sciences<br>Kretchy, Irene ; University of Ghana, School of Pharmacy<br>King, Natalie; University of Leeds, Leeds Institute of Health Sciences |
| <b>Primary Subject Heading</b>: | Health policy                                                                                                                                                                                                                                                                                                                                                                                                                                                                                                                                                                                                                                                                                                                                                                                      |
| Secondary Subject Heading:      | Global health                                                                                                                                                                                                                                                                                                                                                                                                                                                                                                                                                                                                                                                                                                                                                                                      |
| Keywords:                       | Health policy < HEALTH SERVICES ADMINISTRATION & MANAGEMENT, International health services < HEALTH SERVICES ADMINISTRATION & MANAGEMENT, PUBLIC HEALTH                                                                                                                                                                                                                                                                                                                                                                                                                                                                                                                                                                                                                                            |
|                                 |                                                                                                                                                                                                                                                                                                                                                                                                                                                                                                                                                                                                                                                                                                                                                                                                    |

SCHOLARONE™  
Manuscripts



I, the Submitting Author has the right to grant and does grant on behalf of all authors of the Work (as defined in the below author licence), an exclusive licence and/or a non-exclusive licence for contributions from authors who are: i) UK Crown employees; ii) where BMJ has agreed a CC-BY licence shall apply, and/or iii) in accordance with the terms applicable for US Federal Government officers or employees acting as part of their official duties; on a worldwide, perpetual, irrevocable, royalty-free basis to BMJ Publishing Group Ltd ("BMJ") its licensees and where the relevant Journal is co-owned by BMJ to the co-owners of the Journal, to publish the Work in this journal and any other BMJ products and to exploit all rights, as set out in our [licence](#).

The Submitting Author accepts and understands that any supply made under these terms is made by BMJ to the Submitting Author unless you are acting as an employee on behalf of your employer or a postgraduate student of an affiliated institution which is paying any applicable article publishing charge ("APC") for Open Access articles. Where the Submitting Author wishes to make the Work available on an Open Access basis (and intends to pay the relevant APC), the terms of reuse of such Open Access shall be governed by a Creative Commons licence – details of these licences and which [Creative Commons](#) licence will apply to this Work are set out in our licence referred to above.

Other than as permitted in any relevant BMJ Author's Self Archiving Policies, I confirm this Work has not been accepted for publication elsewhere, is not being considered for publication elsewhere and does not duplicate material already published. I confirm all authors consent to publication of this Work and authorise the granting of this licence.

**Title:** Implementation of medicines pricing policies in sub-Saharan Africa: protocol for a systematic review

**Authors:**

- Professor Tolib Mirzoev\*, University of Leeds, Nuffield Centre for International Health and Development [t.mirzoev@leeds.ac.uk](mailto:t.mirzoev@leeds.ac.uk)
- Dr Augustina Koduah, University of Ghana, School of Pharmacy [akoduah@ug.edu.gh](mailto:akoduah@ug.edu.gh)
- Dr Anna Cronin de Chavez, University of Leeds, Nuffield Centre for International Health and Development [A.Chavez@leeds.ac.uk](mailto:A.Chavez@leeds.ac.uk)
- Dr Leonard Baatiema, University of Ghana, School of Pharmacy [baatiemaleonard@gmail.com](mailto:baatiemaleonard@gmail.com)
- Dr Anthony Danso-Appiah, University of Ghana, School of Public Health [adanso-appiah@ug.edu.gh](mailto:adanso-appiah@ug.edu.gh)
- Professor Tim Ensor, University of Leeds, Nuffield Centre for International Health and Development [T.R.A.Ensor@leeds.ac.uk](mailto:T.R.A.Ensor@leeds.ac.uk)
- Professor Irene Akua Agyepong, Ghana Health Service, Research and Development Division [irene.agyepong@gmail.com](mailto:irene.agyepong@gmail.com)
- Mrs Judy Wright, University of Leeds, Leeds Institute of Health Sciences [J.M.Wright@leeds.ac.uk](mailto:J.M.Wright@leeds.ac.uk)
- Dr Irene A Kretchy, University of Ghana, School of Pharmacy [ikretchy@ug.edu.gh](mailto:ikretchy@ug.edu.gh)
- Ms Natalie King, University of Leeds, Leeds Institute of Health Sciences [N.V.King@leeds.ac.uk](mailto:N.V.King@leeds.ac.uk)

\*Corresponding author: Nuffield Centre for International Health and Development, Level 10 Worsley Building, Clarendon Way, Leeds LS2 9NL. [t.mirzoev@leeds.ac.uk](mailto:t.mirzoev@leeds.ac.uk) +44(0)113-343-4869

**Keywords**

Systematic review; medicine pricing; policy implementation; sub-Saharan Africa; global health

**Word count**

2,228 words



## Abstract

### Introduction

Ensuring universal availability and accessibility of medicines and supplies is critical for national health systems to equitably address population health needs. In sub-Saharan Africa (SSA), this is a recognised priority with multiple medicines pricing policies enacted. However, medicine prices have remained high, continue to rise and constrain their accessibility. In this systematic review, we aim to identify and analyse experiences of implementation of medicines pricing policies in SSA. Our ambition is for this evidence to contribute to improved implementation of medicines pricing policies in SSA.

### Methods and analysis

We will search: Medline, Web of Science, Scopus, Global Health, Embase, Cairn.Info International Edition, Erudit and African Index Medicus, the grey literature and reference from related publications. The searches will be limited to literature published from the year 2000 onwards i.e. since the start of the Millennium Development Goals.

Published peer-reviewed studies of implementation of medicines pricing policies in sub-Saharan Africa will be eligible for inclusion. Broader policy analyses and documented experiences of implementation of other health policies will be excluded. The team will collaboratively screen titles and abstracts, then two reviewers will independently screen full-texts, extract data and assess quality of the included studies. Disagreements will be resolved by discussion or a third reviewer. Data will be extracted on approaches used for policy implementation, actors involved, evidence used in decision-making and key contextual influences on policy implementation. A narrative approach will be used to synthesise the data. Reporting will be informed by the Preferred Reporting Items for Systematic Review and Meta-Analysis Protocols (PRISMA) guideline.

### Ethics and dissemination

No ethics approvals are required for systematic reviews.

Results will be disseminated through academic publications, policy briefs and presentations to national policymakers in Ghana and made widely across countries in SSA.

### Registration details

Prospero registration number: CRD42020178166, full record:

[https://www.crd.york.ac.uk/prospero/display\\_record.php?ID=CRD42020178166](https://www.crd.york.ac.uk/prospero/display_record.php?ID=CRD42020178166)

## Article summary

### ***Strengths and limitations of this study***

- This systematic review protocol follows the Preferred Reporting Items for Systematic Review and Meta-Analysis Protocols (PRISMA-P) guidelines;
- The review addresses a gap in the current knowledge of the determinants and outcomes of successful implementation of medicines pricing policies in sub-Saharan Africa;
- The focus on sub-Saharan Africa (SSA) will help with transferability of lessons across the different countries within the region, though this may lead to omission of important experiences for example from Asia and Latin America and may limit transferability of lessons outside the SSA;
- The search will be restricted to peer-reviewed published articles and grey literature, thus relevant theses and conference abstracts are likely to be omitted and may affect the depth of evidence on the topic;
- The narrative synthesis approach reflects the nature of published evidence on the topic of policy implementation with no meta-analysis possible, and is a potential limitation of this review.

peer review only

## Introduction

The current agenda of Universal Health Coverage (UHC) highlights the importance of access to safe, quality and affordable medicines as its key driver.<sup>1-3</sup> Increasing access to essential medicines through medicines pricing interventions is an issue of current health policy discourses.<sup>4-5</sup> In response, various policy initiatives have evolved to regulate medicine pricing and improve access.

Globally, different medicine pricing models and strategies exist. These include: generic or biosimilar price linking to originator products, non-proprietary prescribing and generic substitutions, tendering and pooled procurements, internal reference pricing, external price referencing or international price comparisons, and managed-entry agreements.<sup>6-8</sup> Implementation of these medicine pricing policies may be dependent on in-country manufacturing capacity, pricing levels of the medicines, whether medicines are generic or branded, and whether medicines are for out-patient or in-patient services.<sup>9</sup>

Many of these medicine pricing policies are being implemented in high-income countries. However, unlike in high-income countries, low and middle-income countries (LMICs) have less regulated and developed pharmaceutical markets and have different challenges in distribution and production.<sup>1</sup> In light of this, multiple medicine pricing models and strategies are required to achieve equitable access to safe, quality and affordable medicines<sup>10</sup>, particularly in sub-Saharan African countries (SSA).<sup>10</sup>

## Rationale

Ensuring availability and accessibility of medicines is an important mechanism by which national health systems can equitably address health needs of their populations, including the poorest and the most vulnerable. In SSA, this is a recognised policy priority. For example, in the last two decades different medicines pricing policies were implemented in South Africa<sup>11 12</sup> and between 2012 and 2017, the Government of Ghana introduced four policies to improve access to medicines through medicine price regulation, and ultimately health outcomes and quality of life. These policies are currently at different stages of their implementation and despite these efforts, medicine prices have remained high and continue to rise, making them inaccessible to a large proportion of populations.. This raises questions as to why and how these policies are failing to achieve the desired outcomes.

In this systematic review, we will explore the effectiveness of implementation of medicines pricing policies in the sub-Saharan African context. We want to identify which policies have been implemented and then explore three broad dimensions of their implementation. First, we want to understand *what happened* i.e. identify evidence on effective implementations of medicines pricing policies reflected in a reduction in prices and improvement in access to medicines and subsequently healthcare. Second, we want to understand *how it happened* i.e. we want to identify and unpack the implementation processes and approaches deployed in terms of their timing, participation of actors and role of evidence. Third, we want to understand *why it happened*. We want to identify and synthesise key reported facilitators and barriers to the implementation and understand how they affected the implementation of these policies within their respective contexts.

## ***Aim and objectives***

In this systematic review we will address the following overall question: what are the key determinants of implementation of medicines pricing policies in sub-Saharan African (SSA) countries? More specifically, we will answer four questions:

- a. Which medicines pricing policies have been implemented in SSA and what are their key elements?
- b. How have these policies been implemented (in relation to implementation approaches, processes, involvement of actors, role of evidence etc)?
- c. Which key facilitators and barriers affected the implementation of medicines pricing policies, and how?
- d. Which implementation of medicines pricing policies in SSA are effective (in relation to reducing prices of medicines and improving access to services)?

This review is being undertaken during April 2020 – May 2021 as part of the project on ‘Improving equitable access to essential medicines in Ghana through bridging the gaps in implementing medicines pricing policy’ (AMIPS) – a NIHR-funded award received jointly by the University of Leeds, University of Ghana and the Ghana Health Service. The results of this review will be combined with results of policy analyses in Ghana and will inform engagements with key stakeholders on improving the implementation of the current policies and identification of future research and development priorities. Our ambition is for evidence from this review to contribute to improved implementation of medicines pricing policies across countries of SSA.

This protocol follows the Preferred reporting items for systematic review and meta-analysis protocols (PRISMA-P) guidelines<sup>13</sup> and a PRISMA-P checklist is available as a supplementary file.

## **Methods and analysis**

### ***Eligibility criteria***

#### **Studies**

We will include empirical studies including Randomised Controlled Trials (RCTs), quasi-experimental studies and cohort and cross-sectional studies. Reviews (scoping reviews, meta-syntheses, realist syntheses) will also be included and individual primary studies from the systematic reviews will be manually included as empirical literature. We will exclude opinion pieces and conceptual/theoretical publications which do not report documented empirical data from either primary studies or reviews.

Specific inclusion criteria will be: (a) focus on the medicines pricing policies i.e. policies, strategies, interventions or plans which aim to improve affordability of medicines in the country. The link to improvements in access to healthcare may be implicit and is not a requirement; (b) focus on policy implementation i.e. either as part of the whole policy process (agenda-setting, development, implementation) or as an exclusive focus; (c) sub-Saharan African country contexts i.e. either as part of the comparative studies or as a sole focus; (d) studies which were published since the agenda of Millennium Development Goals was initiated shortly before 2000; and (e) papers with relevant information available for analysis.

Specific exclusion criteria are: (a) policy analyses which focus solely on policy agenda-setting and development stages of the policy process; (b) studies from high-income country contexts and outside sub-Saharan Africa; (c) studies conducted two years or more prior to 2000 but published after 2000, will be excluded in consideration of MDG and SDG agenda which started in 2000; (d)

1  
2  
3 papers in languages where we are unable to have the resources for translation (the team has access  
4 to French, Spanish and Russian-speaking researchers) and (e) papers with no full text available for  
5 analysis.  
6

## 7 **Participants**

8  
9  
10 The participants to be covered in this review will be: policymakers, implementers, service providers,  
11 patients and beneficiaries of successful implementation of medicines pricing policies (of any gender,  
12 age, ethnicity, socio-economic group, health status or urban-rural residence).  
13

## 14 **Interventions**

15  
16  
17 Implementation of medicines pricing policies i.e. policies, strategies, interventions or plans which  
18 aim to improve affordability of medicines in the country.  
19

## 20 **Comparison**

21  
22 No comparison or control is applicable to this study  
23

## 24 **Outcomes**

25  
26  
27 Successful implementation will be measured as reduction in medicines prices, and improved access  
28 to medicines along the supply chain. Any studies describing unsuccessful implementation will also be  
29 used to inform the lessons learned.  
30

## 31 **Study records**

### 32 **Searches**

33  
34 We will search the following databases: Medline (1946 – present), Web of Science (1990 – present),  
35 Scopus (1823 – present), Global Health (1973 – present), Embase (1947 – present), Cairn.Info  
36 International Edition (all available years), Erudit (all available years) and African Index Medicus (all  
37 available years). The Medline search strategy is available as a supplementary file. The search  
38 strategies will incorporate index terms (MeSH) and text words for the search concepts:  
39

- 40 1. Sub-Saharan African Countries. This will include terms/synonyms for sub-Saharan Africa AND list  
41 of individual countries in the region
- 42 2. Drug/Medicines pricing. This will include terms/synonyms for: medicines / pharmaceuticals /  
43 drugs / prescriptions AND pricing / cost / affordability / fees / purchase / rebate(s) / tariffs /  
44 incentives / benchmarking / reference pricing / payment / spend\* / expenditure / subsid\* /  
45 procurement
- 46 3. Policy. This will include terms/synonyms for: policy / strategy / plan / framework / regulations /  
47 guidelines / rules / intervention / tax / exemption
- 48 4. Implementation. This will include terms / synonyms for: Implementing / Implement(s) /  
49 Implementation approach(es) / Process(es) / Facilitator(s) / Barrier(s) / Factors / Determinants /  
50 context  
51  
52  
53  
54

55 The searches will be limited to the literature published from the year 2000 and onwards. This is in  
56 consideration of the Millennium Development Goals agenda which started in 2000 with a clear focus  
57 on improving access to medicines and services. We will follow-up on the references to the individual  
58 studies as required. We will manually search for the included references in relevant retrieved  
59 reviews (systematic reviews, scoping reviews, meta-syntheses, realist syntheses) for additional  
60

1  
2  
3 relevant studies for inclusion. In addition, we will search grey literature including global  
4 development websites: WHO IRIS, World Bank, DFID/K4D repository, Gates Foundation and contacts  
5 with experts in the field.  
6

### 7 **Data management**

8  
9  
10 We will upload all references identified through searches (electronic database and additional  
11 searches) into Endnote version X9. Once duplicates are removed, the remaining references will be  
12 exported into Rayyan (<https://rayyan.qcri.org/welcome>), an online free systematic review tool for  
13 screening.  
14

### 15 **Screening**

16  
17  
18 Titles and abstracts will be divided up across the review team and screened individually for eligibility  
19 using pre-specified eligibility criteria flowchart, which is available in a supplementary file. At least  
20 20% of individually reviewed titles and abstracts will then be cross-checked by at least two members  
21 of the team. Full texts will be obtained for all the potentially relevant studies and screened by two  
22 members of the team independently, and disagreements will be resolved through discussion. Where  
23 necessary, a third member of the team will engage to help resolve disagreements.  
24

### 25 **Data extraction**

26  
27  
28 The following data will be extracted by two members of the review team into an appropriate data  
29 extraction form:  
30

- 31 • article information (full citation, year study was conducted, study type, setting / country);
- 32 • medicine pricing policies studied (including which key elements the policies included);
- 33 • documented effects on prices of medicines (including how identified and reported);
- 34 • effects on access to medicines (including how identified and reported);
- 35 • effects on access to healthcare (including how identified and reported);
- 36 • implementation approach (including processes, actors involved and their roles and evidence  
37 used to inform implementation);
- 38 • key influences on policy implementation (including facilitators and constraints and how they  
39 affected implementation).  
40  
41

### 42 **Quality assessment and risk of bias**

43  
44  
45 Quality of each included study will be appraised. We will utilise validated quality assessment tools  
46 and the critical appraisal tools for relevant studies (qualitative and quantitative research) from the  
47 Joanna Briggs Institute [https://joannabriggs.org/ebp/critical\\_appraisal\\_tools](https://joannabriggs.org/ebp/critical_appraisal_tools). While at this point, we  
48 do not intend to change the actual criteria, the interpretation and application of the tools will be  
49 within the context of our study which focuses on key determinants of effective implementation of  
50 medicines pricing policies in SSA context. For example, clarity of focus will be assessed in relation to  
51 how the different aspects of policy implementation (processes, use of evidence, involvement of  
52 actors) are identified and consistently used in the reviewed papers.  
53

54  
55 A careful assessment of risk of bias in the included studies will be performed by two reviewers, who  
56 will first independently assess the quality of each study against each criterion. Results will be shared  
57 and agreed, and any disagreements will be addressed through engaging a third reviewer.  
58  
59  
60

## ***Data synthesis and interpretation***

### **Strategy for data synthesis.**

The main outcome in our study is the medicine pricing policy implementation. Policy implementation is typically done within a single country, but where the same policy is implemented in different countries, the analysis will take the specific context of the country into consideration.

In exploring the policy implementation, we will employ established policy theories and frameworks such as Walt and Gilson's policy triangle<sup>14</sup>, Baumgartner's punctuated equilibrium<sup>15</sup> and Lipsky's street-level bureaucracy<sup>16</sup>, and will also draw upon further theories and frameworks developed or adapted within the reviewed papers.

Where possible, we will compare the effects of the policies in a quantitative synthesis. We anticipate, however, that the heterogeneity of reporting of outcomes and of context may make it impossible to conduct a meta-analysis. In such a situation we will focus on narrative synthesis.

Whilst using qualitative or narrative synthesis approach<sup>17</sup>, data related to the medicines pricing policies will be extracted from the Introduction, Methods and possibly Results sections. Data on the effects of policy implementation and the policy implementation approaches, and key influences will be extracted from the Results and Discussion sections. Extracted data will be analysed thematically and will be structured around the specific questions of the review.

The interpretation of the results will follow the identified themes for each review question. For example, in answering the third review question we will divide the factors into facilitators and constraints and potentially will further sub-divide them by their nature (e.g. community issues, health systems issues, wider socio-economic influences).

At the moment, we are not planning analysis of sub-groups or sub-sets. However, depending on the breadth of extracted data we may consider sub-groups such as geographical region (West Africa, East Africa, Southern Africa), setting (urban, rural) or categories of implementers (health facilities, pharmacies).

The cumulative strength of body of evidence will be assessed across the risk of bias and consistency, drawing upon relevant approaches such as GRADE.

### ***Patient and public involvement***

No patient involved.

### ***Ethics and dissemination***

Ethics approvals are not required for systematic reviews. However, ethics approvals for the wider AMIPS study within which this review is being undertaken have been granted by the ethics committees from the Ghana Health Service (ref GHS-ERC006/02/20) and the University of Leeds School of Medicine (ref MREC 19-060).

We will disseminate results through academic papers and stakeholder workshops in Ghana and other SSA countries where possible. In Ghana, the review results will be complemented by reviews of policy documents. The findings of this review will also be presented at scientific conferences such as the biannual Global Symposia on Health Systems Research and Thematic Working Groups of the Health Systems Global.



1  
2  
3 The results of this review will inform empirical investigations of implementation of medicines pricing  
4 policies in Ghana through the in-depth interviews and focus groups, and engagements and  
5 consultations with policymakers on seeking ways of further improving the implementation of  
6 medicines pricing policies in Ghana.  
7  
8

---

## 11 Authors' contributions

12  
13  
14  
15 AK and TM jointly conceived the study; TM, AK, AC, LB, ADA, TE, IA, JW, IK, NK contributed to the  
16 review design and jointly wrote the protocol; TM, AK, AC, LB, ADA, TE, IA, JW, IK, NK read and  
17 approved the final version of the manuscript. AK and TM will be the guarantors of the review.  
18  
19

## 21 Funding

22  
23 This research was commissioned by the National Institute for Health Research (NIHR) NIHR Global  
24 Health Policy and Systems Research Development Award using UK aid from the UK Government  
25 (grant number 130219). The funders did not have any role in developing the protocol and the views  
26 expressed in this publication are those of the author(s) and not necessarily those of the NIHR or the  
27 Department of Health and Social Care.  
28  
29

## 32 Competing interests

33  
34  
35 None declared  
36  
37

---

## 39 References

- 40  
41  
42 1. Bigdeli M, Laing R, Tomson G. Medicines and universal health coverage: challenges and  
43 opportunities: BioMed Central, 2015. 1-3  
44 2. Ghebreyesus TA. All roads lead to universal health coverage. *The Lancet Global Health*  
45 2017;5(9):e839-e40.  
46 3. Wirtz VJ, Hogerzeil HV, Gray AL, et al. Essential medicines for universal health coverage. *The*  
47 *Lancet* 2017;389(10067):403-76.  
48 4. World Health O, Regional Office for E. Access to new medicines in Europe : technical review of  
49 policy initiatives and opportunities for collaboration and research. 2015  
50 5. World Health Organization. Assessment of medicine pricing and reimbursement systems in health  
51 insurance schemes. 2016  
52 6. Bashaar M, Hassali F, ALrasheedy A, et al. Efficacy of international approaches to medicine price  
53 regulation and control: A scoping review. *J Appl Pharm Sci* 2017;7(04):227-41.  
54 7. Leopold C, Vogler S, Mantel-Teeuwisse AK, et al. Differences in external price referencing in  
55 Europe—a descriptive overview. *Health Policy* 2012;104(1):50-60.  
56 8. Vogler S, Paris V, Ferrario A, et al. How can pricing and reimbursement policies improve affordable  
57 access to medicines? Lessons learned from European countries. *Applied health economics*  
58 *and health policy* 2017;15(3):307-21.  
59  
60



- 1
- 2
- 3 9. Vogler S, Zimmermann N, de Joncheere K. Policy interventions related to medicines: Survey of
- 4 measures taken in European countries during 2010–2015. *Health Policy* 2016;120(12):1363-
- 5 77.
- 6
- 7 10. Nguyen TA, Knight R, Roughead EE, et al. Policy options for pharmaceutical pricing and
- 8 purchasing: issues for low-and middle-income countries. *Health policy and planning*
- 9 2015;30(2):267-80.
- 10
- 11 11. Moodley R, Suleman F. Evaluating the impact of the single exit price policy on a basket of
- 12 originator medicines in South Africa from 1999 to 2014 using a time series analysis. *BMC*
- 13 *Health Services Research* 2019;19(1):576. doi: 10.1186/s12913-019-4403-8
- 14
- 15 12. Steyn R, Burger JR, Serfontein JHP, et al. Influence of a new reference-based pricing system in
- 16 South Africa on the prevalence and cost of antidiabetic medicine: a pilot study. *International*
- 17 *Journal of Pharmacy Practice* 2007;15(4):307-11. doi: 10.1211/ijpp.15.4.0009
- 18
- 19 13. Shamseer L, Moher D, Clarke M, et al. Preferred reporting items for systematic review and meta-
- 20 analysis protocols (PRISMA-P) 2015: elaboration and explanation. *BMJ : British Medical*
- 21 *Journal* 2015;349:g7647. doi: 10.1136/bmj.g7647
- 22
- 23 14. Walt G, Gilson L. Reforming the health sector in developing countries: the central role of policy
- 24 analysis. *Health Policy Plan* 1994;9(4):353-70.
- 25
- 26 15. Baumgartner F, Jones B. Agendas and Instability in American Politics. Chicago, London: University
- 27 of Chicago Press 1993.
- 28
- 29 16. Lipsky M. Street-level bureaucracy: dilemmas of the individual in public services New York:
- 30 Russel Sage Foundation 1980.
- 31
- 32 17. Snilstveit B, Oliver S, Vojtkova M. Narrative approaches to systematic review and synthesis of
- 33 evidence for international development policy and practice. *Journal of Development*
- 34 *Effectiveness* 2012;4(3):409-29. doi: 10.1080/19439342.2012.710641
- 35
- 36
- 37
- 38
- 39
- 40
- 41
- 42
- 43
- 44
- 45
- 46
- 47
- 48
- 49
- 50
- 51
- 52
- 53
- 54
- 55
- 56
- 57
- 58
- 59
- 60

## AMIPS project: Flowchart for screening of search results

1  
2  
3  
4  
5  
6  
7  
8  
9  
10  
11  
12  
13  
14  
15  
16  
17  
18  
19  
20  
21  
22  
23  
24  
25  
26  
27  
28  
29  
30  
31  
32  
33  
34  
35  
36  
37  
38  
39  
40  
41  
42  
43  
44  
45  
46  
47  
48  
49  
50  
51  
52  
53  
54  
55  
56  
57  
58  
59  
60

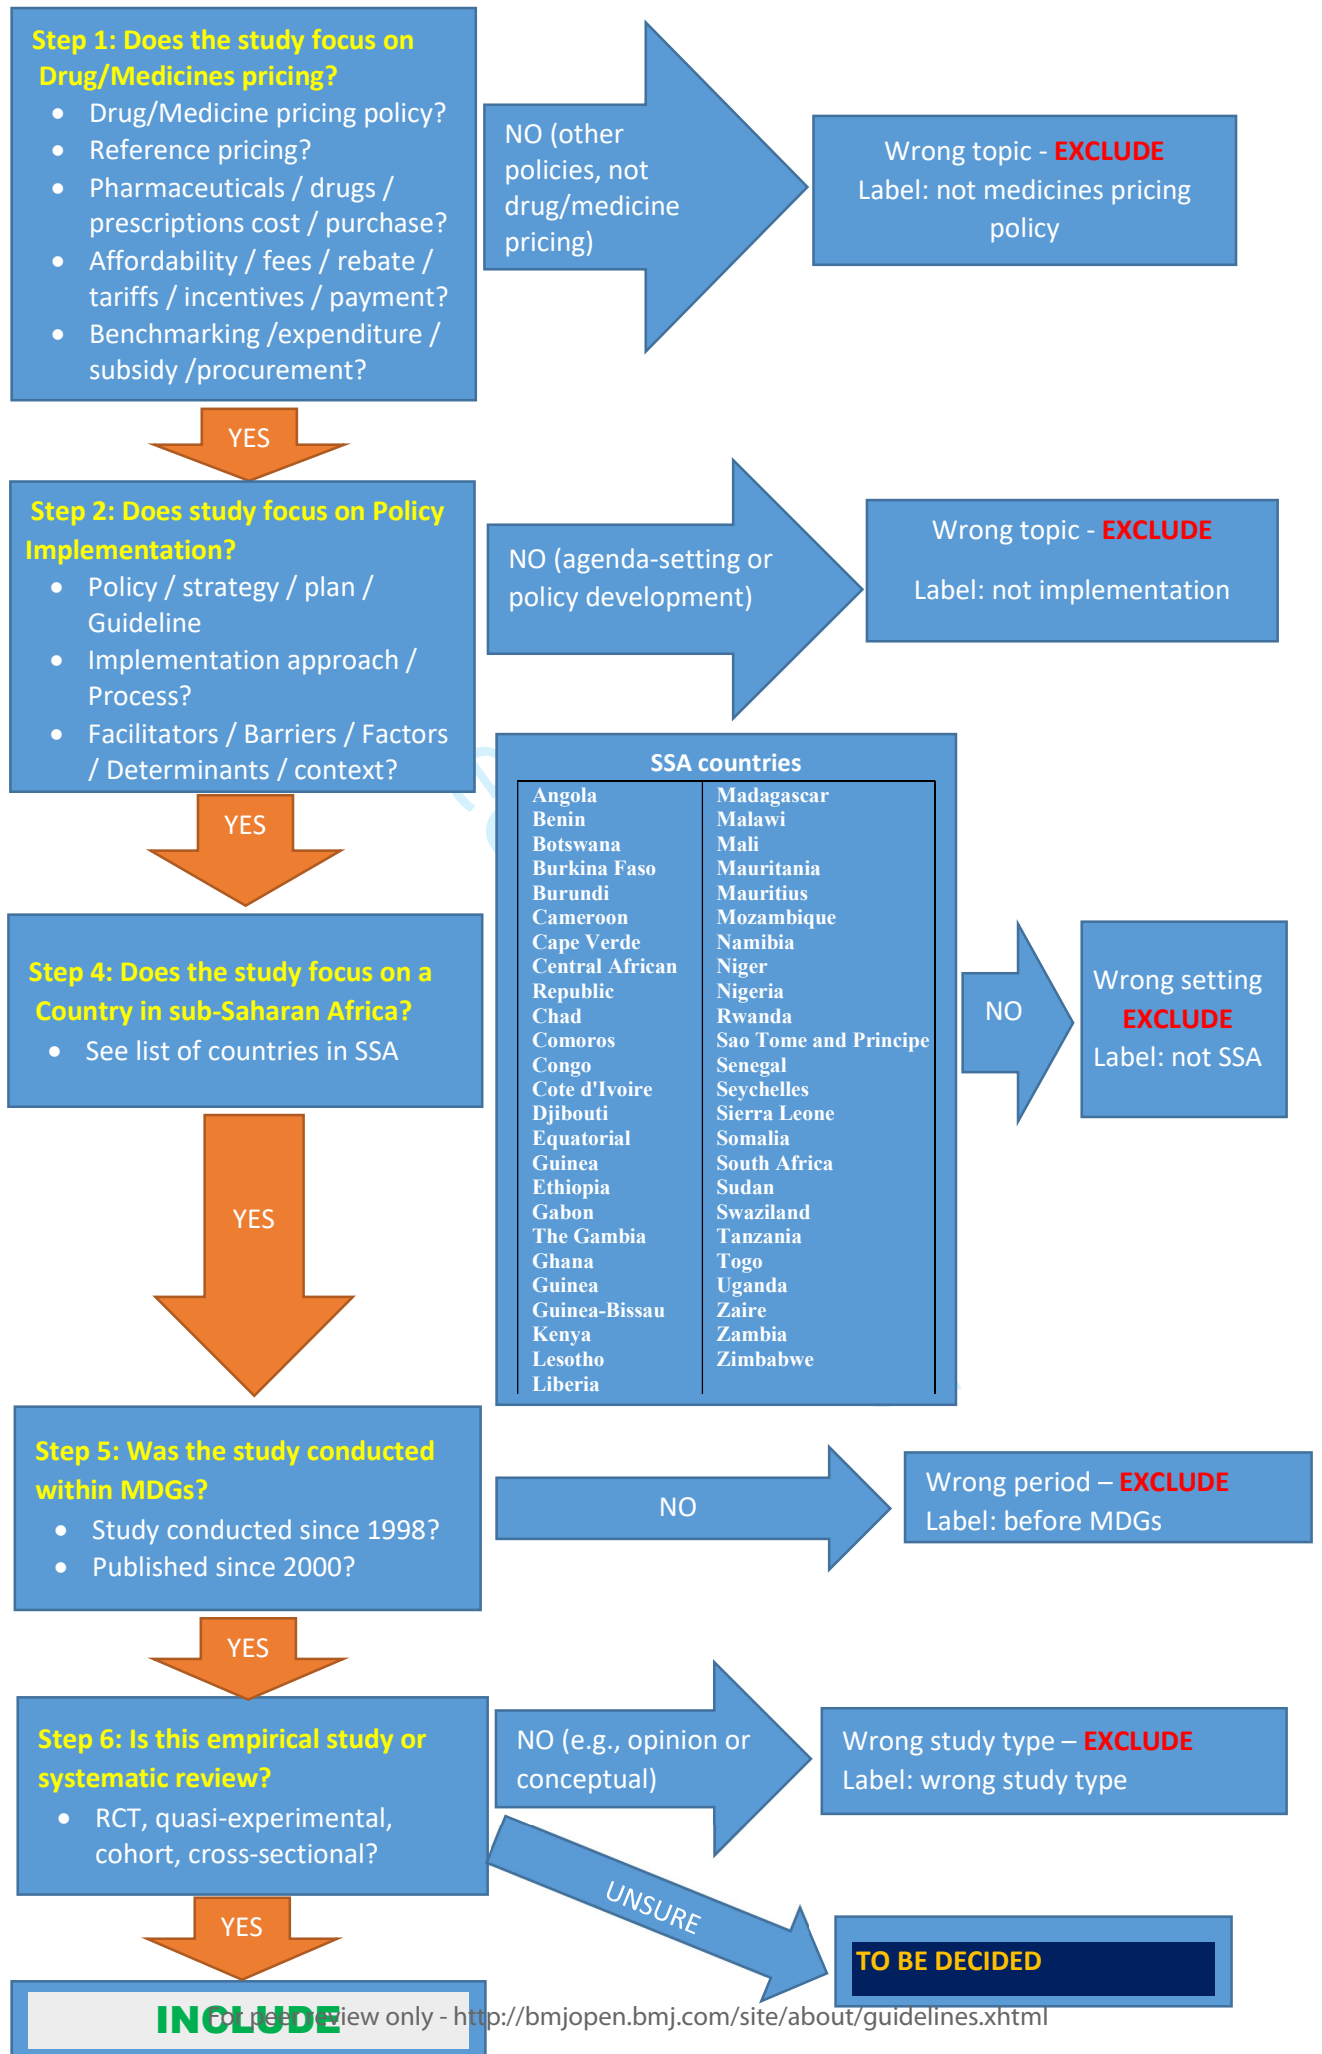

Along with Medline we intend to search the following databases:

African Index Medicus (via WHO Global Health Index Medicus) all available years; Embase (Ovid) 1996 present; Global Health (Ovid) 1973 to present; Scopus (Elsevier B.V.) 1823 – Present; Web of Science Core Collection: Citation Indexes (Clarivate Analytics) 1900-present;. We will also search for grey literature and French articles in the following; Cairn International (Cairn Info) all available years; Erudit (University of Montreal ???) all available years; IRIS Institutional Repository for Information Sharing (WHO) all available years and World Bank Group Research and Publications

### Sample Medline strategy

Ovid MEDLINE(R) and Epub Ahead of Print, In-Process & Other Non-Indexed Citations and Daily <1946 to April 23, 2020>

Search Strategy:

- 
- 1 exp "Africa South of the Sahara"/ (205870)
  - 2 (angola\* or benin\* or botswana\* or "burkina faso" or burundi\*).ti,ab,in,kf. (17906)
  - 3 ("cabo verde\*" or "cape verde\*" or cameroon\* or "central africa\*" or chad or cormoros or congo\* or "ivory coast" or "cote d'ivoire" or djibouti).ti,ab,in,kf. (45277)
  - 4 (guinea\* or eritrea\* or eswatini\* or swaziland\* or ethiopia\* or gabon\* or gambia\* or ghana\* or guinea\*).ti,ab,in,kf. (158364)
  - 5 (kenya\* or lesotho\* or liberia\* or madagasca\* or malawi\* or mali or mauritania\* or mauritius or mozambique\*).ti,ab,in,kf. (55553)
  - 6 (namibia\* or niger or nigeria\* or rwanda\*).ti,ab,in,kf. (67659)
  - 7 ("sao tome" or principe\* or senegal\* or seychelles or "sierra leone\*" or somali\* or "south africa\*" or sudan\*).ti,ab,in,kf. (132358)
  - 8 (tanzania\* or togo\* or uganda\* or zambia\* or zaire\* or zimbabw\*).ti,ab,in,kf. (50798)
  - 9 (africa\* adj2 ("sub sahara\*" or "south\* sahara\*")).ti,ab,in,kf. (23957)
  - 10 or/1-9 [sub-saharan africa] (519682)
  - 11 Drug Costs/ (15924)
  - 12 ((price? or pricing) adj5 (medicine? or drug? or prescription? or pharmaceutical\*)).tw,kw. (4558)
  - 13 ((cost or costs) adj5 (medicine? or drug? or prescription? or pharmaceutical\*)).tw,kw. (18930)
  - 14 (afford\* adj5 (medicine? or drug? or prescription? or pharmaceutical\*)).tw,kw. (1929)
  - 15 (reimburs\* adj5 (medicine? or drug? or prescription? or pharmaceutical\*)).tw,kw. (2099)
  - 16 (generic\* adj5 (medicine? or drug? or prescription? or pharmaceutical\*)).tw,kw. (4521)
  - 17 exp fees, pharmaceutical/ (2413)

- 1  
2  
3 18 ((purchas\* or procur\* or expenditure\*) adj5 (medicine? or drug? or prescription? or  
4 pharmaceutical\*).tw,kw. (4913)  
5  
6 19 ((subsid\* or tariff\* or incentive\* or containment or transparency) adj5 (medicine? or drug? or  
7 prescription? or pharmaceutical\*).tw,kw. (2141)  
8  
9 20 ((fee or fees or rebate\* or payment\* or spend\* or saving\*) adj5 (medicine? or drug? or  
10 prescription? or pharmaceutical\*).tw,kw. (4006)  
11  
12 21 ((benchmark\* or cost-plus) adj12 (medicine? or drug? or prescription? or  
13 pharmaceutical\*).tw,kw. (641)  
14  
15 22 "low\* price\* generic\*".tw,kw. (76)  
16  
17 23 (essential adj2 (drug\* or medicine\*).tw,kw. (3434)  
18  
19 24 Drugs, Essential/ (835)  
20  
21 25 (access\* adj3 (medicine? or drug? or prescription? or pharmaceutical\*).tw,kw. (5991)  
22  
23 26 Economics, Pharmaceutical/ (2927)  
24  
25 27 (pharma\* adj2 economic\*).tw,kw. (833)  
26  
27 28 pharmaco-economic\*.tw,kw. (3898)  
28  
29 29 or/11-28 [drug pricing] (58841)  
30  
31 30 exp policy/ (155119)  
32  
33 31 Government Regulation/ (21073)  
34  
35 32 exp Legislation, Drug/ (32091)  
36  
37 33 ((drug\* or medicine\* or pharmaceutical\* or prescription\* or health\*) adj7 (guideline\* or  
38 guidance or policy or policies or law or regulat\* or rule\* or legislat\* or control\* or strateg\* or  
39 framework\*).tw,kw. (538082)  
40  
41 34 (tax or taxes or exemption\*).tw,kw. (17307)  
42  
43 35 ((drug\* or medicine\* or pharmaceutical\* or prescription\* or health\*) adj7 (intervention\* or  
44 plan\* or program\*).tw,kw. (256052)  
45  
46 36 or/30-35 [policy concept -all] (917754)  
47  
48 37 10 and 29 and 36 [SSA and policy ] (1190)  
49  
50 38 Health Plan Implementation/ (5829)  
51  
52 39 Program Evaluation/ (62240)  
53  
54 40 (barrier\* or facilitator\* or challenge\* or motivator\*).tw,kw. (923252)  
55  
56 41 (implement\* or approach\* or process\*).tw,kw. (3962356)  
57  
58 42 (factor\* or determinant\* or context\*).tw,kw. (3829825)  
59  
60 43 "scal\* up".tw,kw. (19228)

- 1
- 2
- 3 44 adopt\*.tw,kw. (243593)
- 4
- 5 45 or/38-44 [implementation] (7698904)
- 6
- 7 46 10 and 29 and 36 and 45 (763)
- 8
- 9 47 limit 46 to yr="2000 -Current" (652)
- 10
- 11
- 12
- 13
- 14
- 15
- 16
- 17
- 18
- 19
- 20
- 21
- 22
- 23
- 24
- 25
- 26
- 27
- 28
- 29
- 30
- 31
- 32
- 33
- 34
- 35
- 36
- 37
- 38
- 39
- 40
- 41
- 42
- 43
- 44
- 45
- 46
- 47
- 48
- 49
- 50
- 51
- 52
- 53
- 54
- 55
- 56
- 57
- 58
- 59
- 60

For peer review only

**Title:** Implementation of medicines pricing policies in sub-Saharan Africa: protocol for a systematic review

PRISMA-P (preferred reporting items for systematic review and meta-analysis protocols) 2015 checklist: recommended items to address in a systematic review protocol

| <i>Section and topic</i>          | <i>Item No</i> | <i>Checklist item</i>                                                                                                                                                                           | <i>Y/N</i> | <i>Page number</i> | <i>Line numbers</i> |
|-----------------------------------|----------------|-------------------------------------------------------------------------------------------------------------------------------------------------------------------------------------------------|------------|--------------------|---------------------|
| <b>Administrative information</b> |                |                                                                                                                                                                                                 |            |                    |                     |
| Title:                            |                |                                                                                                                                                                                                 |            |                    |                     |
| Identification                    | 1a             | Identify the report as a protocol of a systematic review                                                                                                                                        | Y          | 1                  | 1-2                 |
| Update                            | 1b             | If the protocol is for an update of a previous systematic review, identify as such                                                                                                              | n/a        | n/a                | n/a                 |
| Registration                      | 2              | If registered, provide the name of the registry (such as PROSPERO) and registration number                                                                                                      | Y          | 2                  | 67-68               |
| Authors:                          |                |                                                                                                                                                                                                 |            |                    |                     |
| Contact                           | 3a             | Provide name, institutional affiliation, e-mail address of all protocol authors; provide physical mailing address of corresponding author                                                       | Y          | 1                  | 6-26                |
| Contributions                     | 3b             | Describe contributions of protocol authors and identify the guarantor of the review                                                                                                             | Y          | 9                  | 297-299             |
| Amendments                        | 4              | If the protocol represents an amendment of a previously completed or published protocol, identify as such and list changes; otherwise, state plan for documenting important protocol amendments | n/a        | n/a                | n/a                 |
| Support:                          |                |                                                                                                                                                                                                 |            |                    |                     |
| Sources                           | 5a             | Indicate sources of financial or other support for the review                                                                                                                                   | Y          | 9                  | 302-304             |
| Sponsor                           | 5b             | Provide name for the review funder and/or sponsor                                                                                                                                               | Y          | 9                  | 302-304             |
| Role of sponsor or funder         | 5c             | Describe roles of funder(s), sponsor(s), and/or institution(s), if any, in developing the protocol                                                                                              | Y          | 9                  | 304-306             |
| <b>Introduction</b>               |                |                                                                                                                                                                                                 |            |                    |                     |
| Rationale                         | 6              | Describe the rationale for the review in the context of what is already known                                                                                                                   | Y          | 4                  | 108-126             |
| Objectives                        | 7              | Provide an explicit statement of the question(s) the review will address with reference to participants, interventions, comparators, and outcomes (PICO)                                        | Y          | 5                  | 129-147             |
| <b>Methods</b>                    |                |                                                                                                                                                                                                 |            |                    |                     |

| <i>Section and topic</i>           | <i>Item No</i> | <i>Checklist item</i>                                                                                                                                                                                                         | <i>Y/N</i> | <i>Page number</i> | <i>Line numbers</i> |
|------------------------------------|----------------|-------------------------------------------------------------------------------------------------------------------------------------------------------------------------------------------------------------------------------|------------|--------------------|---------------------|
| Eligibility criteria               | 8              | Specify the study characteristics (such as PICO, study design, setting, time frame) and report characteristics (such as years considered, language, publication status) to be used as criteria for eligibility for the review | Y          | 5-6                | 153-186             |
| Information sources                | 9              | Describe all intended information sources (such as electronic databases, contact with study authors, trial registers or other grey literature sources) with planned dates of coverage                                         | Y          | 5                  | 154-158             |
| Search strategy                    | 10             | Present draft of search strategy to be used for at least one electronic database, including planned limits, such that it could be repeated                                                                                    | Y          | 6-7                | 189-212             |
| Study records:                     |                |                                                                                                                                                                                                                               |            |                    |                     |
| Data management                    | 11a            | Describe the mechanism(s) that will be used to manage records and data throughout the review                                                                                                                                  | Y          | 7                  | 214-217             |
| Selection process                  | 11b            | State the process that will be used for selecting studies (such as two independent reviewers) through each phase of the review (that is, screening, eligibility and inclusion in meta-analysis)                               | Y          | 7                  | 219-224             |
| Data collection process            | 11c            | Describe planned method of extracting data from reports (such as piloting forms, done independently, in duplicate), any processes for obtaining and confirming data from investigators                                        | Y          | 7                  | 226-236             |
| Data items                         | 12             | List and define all variables for which data will be sought (such as PICO items, funding sources), any pre-planned data assumptions and simplifications                                                                       | Y          | 7-8                | 228-236             |
| Outcomes and prioritization        | 13             | List and define all outcomes for which data will be sought, including prioritization of main and additional outcomes, with rationale                                                                                          | Y          | 8                  | 251-273             |
| Risk of bias in individual studies | 14             | Describe anticipated methods for assessing risk of bias of individual studies, including whether this will be done at the outcome or study level, or both; state how this information will be used in data synthesis          | Y          | 7                  | 237-248             |
| Data synthesis                     | 15a            | Describe criteria under which study data will be quantitatively synthesised                                                                                                                                                   | n/a        | n/a                | n/a                 |

| <i>Section and topic</i>          | <i>Item No</i> | <i>Checklist item</i>                                                                                                                                                                                                                                     | <i>Y/N</i> | <i>Page number</i> | <i>Line numbers</i> |
|-----------------------------------|----------------|-----------------------------------------------------------------------------------------------------------------------------------------------------------------------------------------------------------------------------------------------------------|------------|--------------------|---------------------|
|                                   | 15b            | If data are appropriate for quantitative synthesis, describe planned summary measures, methods of handling data and methods of combining data from studies, including any planned exploration of consistency (such as I <sup>2</sup> , Kendall's $\tau$ ) | n/a        | n/a                | n/a                 |
|                                   | 15c            | Describe any proposed additional analyses (such as sensitivity or subgroup analyses, meta-regression)                                                                                                                                                     | n/a        | n/a                | n/a                 |
|                                   | 15d            | If quantitative synthesis is not appropriate, describe the type of summary planned                                                                                                                                                                        | Y          | 8                  | 261-269             |
| Meta-bias(es)                     | 16             | Specify any planned assessment of meta-bias(es) (such as publication bias across studies, selective reporting within studies)                                                                                                                             | Y          | 8                  | 258-260             |
| Confidence in cumulative evidence | 17             | Describe how the strength of the body of evidence will be assessed (such as GRADE)                                                                                                                                                                        | Y          | 8                  | 266-275             |
