# Supplementary material for: Implementation of medicines pricing policies in sub-Saharan Africa: protocol for a systematic review
Source: PubMed Central journal article supplement (PMC7907884; doi:10.1136/bmjopen-2020-044293), 2021-02-23
Supplement: bmjopen-2020-044293supp002.pdf [file bmjopen-2020-044293supp002.pdf]

Along with Medline we intend to search the following databases:

African Index Medicus (via WHO Global Health Index Medicus) all available years; Embase (Ovid) 1996 present; Global Health (Ovid) 1973 to present; Scopus (Elsevier B.V.) 1823 – Present; Web of Science Core Collection: Citation Indexes (Clarivate Analytics) 1900-present;. We will also search for grey literature and French articles in the following; Cairn International (Cairn Info) all available years; Erudit (University of Montreal ???) all available years; IRIS Institutional Repository for Information Sharing (WHO) all available years and World Bank Group Research and Publications

### Sample Medline strategy

Ovid MEDLINE(R) and Epub Ahead of Print, In-Process & Other Non-Indexed Citations and Daily <1946 to April 23, 2020>

Search Strategy:

- 
- 1 exp "Africa South of the Sahara"/ (205870)
  - 2 (angola\* or benin\* or botswana\* or "burkina faso" or burundi\*).ti,ab,in,kf. (17906)
  - 3 ("cabo verde\*" or "cape verde\*" or cameroon\* or "central africa\*" or chad or cormoros or congo\* or "ivory coast" or "cote d'ivoire" or djibouti).ti,ab,in,kf. (45277)
  - 4 (guinea\* or eritrea\* or eswatini\* or swaziland\* or ethiopia\* or gabon\* or gambia\* or ghana\* or guinea\*).ti,ab,in,kf. (158364)
  - 5 (kenya\* or lesotho\* or liberia\* or madagasca\* or malawi\* or mali or mauritania\* or mauritius or mozambique\*).ti,ab,in,kf. (55553)
  - 6 (namibia\* or niger or nigeria\* or rwanda\*).ti,ab,in,kf. (67659)
  - 7 ("sao tome" or principe\* or senegal\* or seychelles or "sierra leone\*" or somali\* or "south africa\*" or sudan\*).ti,ab,in,kf. (132358)
  - 8 (tanzania\* or togo\* or uganda\* or zambia\* or zaire\* or zimbabw\*).ti,ab,in,kf. (50798)
  - 9 (africa\* adj2 ("sub sahara\*" or "south\* sahara\*")).ti,ab,in,kf. (23957)
  - 10 or/1-9 [sub-saharan africa] (519682)
  - 11 Drug Costs/ (15924)
  - 12 ((price? or pricing) adj5 (medicine? or drug? or prescription? or pharmaceutical\*)).tw,kw. (4558)
  - 13 ((cost or costs) adj5 (medicine? or drug? or prescription? or pharmaceutical\*)).tw,kw. (18930)
  - 14 (afford\* adj5 (medicine? or drug? or prescription? or pharmaceutical\*)).tw,kw. (1929)
  - 15 (reimburs\* adj5 (medicine? or drug? or prescription? or pharmaceutical\*)).tw,kw. (2099)
  - 16 (generic\* adj5 (medicine? or drug? or prescription? or pharmaceutical\*)).tw,kw. (4521)
  - 17 exp fees, pharmaceutical/ (2413)

- 18 ((purchas\* or procur\* or expenditure\*) adj5 (medicine? or drug? or prescription? or pharmaceutical\*).tw,kw. (4913)
- 19 ((subsid\* or tariff\* or incentive\* or containment or transparency) adj5 (medicine? or drug? or prescription? or pharmaceutical\*).tw,kw. (2141)
- 20 ((fee or fees or rebate\* or payment\* or spend\* or saving\*) adj5 (medicine? or drug? or prescription? or pharmaceutical\*).tw,kw. (4006)
- 21 ((benchmark\* or cost-plus) adj12 (medicine? or drug? or prescription? or pharmaceutical\*).tw,kw. (641)
- 22 "low\* price\* generic\*".tw,kw. (76)
- 23 (essential adj2 (drug\* or medicine\*).tw,kw. (3434)
- 24 Drugs, Essential/ (835)
- 25 (access\* adj3 (medicine? or drug? or prescription? or pharmaceutical\*).tw,kw. (5991)
- 26 Economics, Pharmaceutical/ (2927)
- 27 (pharma\* adj2 economic\*).tw,kw. (833)
- 28 pharmacoeconomic\*.tw,kw. (3898)
- 29 or/11-28 [drug pricing] (58841)
- 30 exp policy/ (155119)
- 31 Government Regulation/ (21073)
- 32 exp Legislation, Drug/ (32091)
- 33 ((drug\* or medicine\* or pharmaceutical\* or prescription\* or health\*) adj7 (guideline\* or guidance or policy or policies or law or regulat\* or rule\* or legislat\* or control\* or strateg\* or framework\*).tw,kw. (538082)
- 34 (tax or taxes or exemption\*).tw,kw. (17307)
- 35 ((drug\* or medicine\* or pharmaceutical\* or prescription\* or health\*) adj7 (intervention\* or plan\* or program\*).tw,kw. (256052)
- 36 or/30-35 [policy concept -all] (917754)
- 37 10 and 29 and 36 [SSA and policy ] (1190)
- 38 Health Plan Implementation/ (5829)
- 39 Program Evaluation/ (62240)
- 40 (barrier\* or facilitator\* or challenge\* or motivator\*).tw,kw. (923252)
- 41 (implement\* or approach\* or process\*).tw,kw. (3962356)
- 42 (factor\* or determinant\* or context\*).tw,kw. (3829825)
- 43 "scal\* up".tw,kw. (19228)

- 44 adopt\*.tw,kw. (243593)
- 45 or/38-44 [implementation] (7698904)
- 46 10 and 29 and 36 and 45 (763)
- 47 limit 46 to yr="2000 -Current" (652)
