# Supplementary material for: Implementation of medicines pricing policies in sub-Saharan Africa: protocol for a systematic review
Source: PubMed Central journal article supplement (PMC7907884; doi:10.1136/bmjopen-2020-044293), 2021-02-23

### AMIPS project: Flowchart for screening of search results

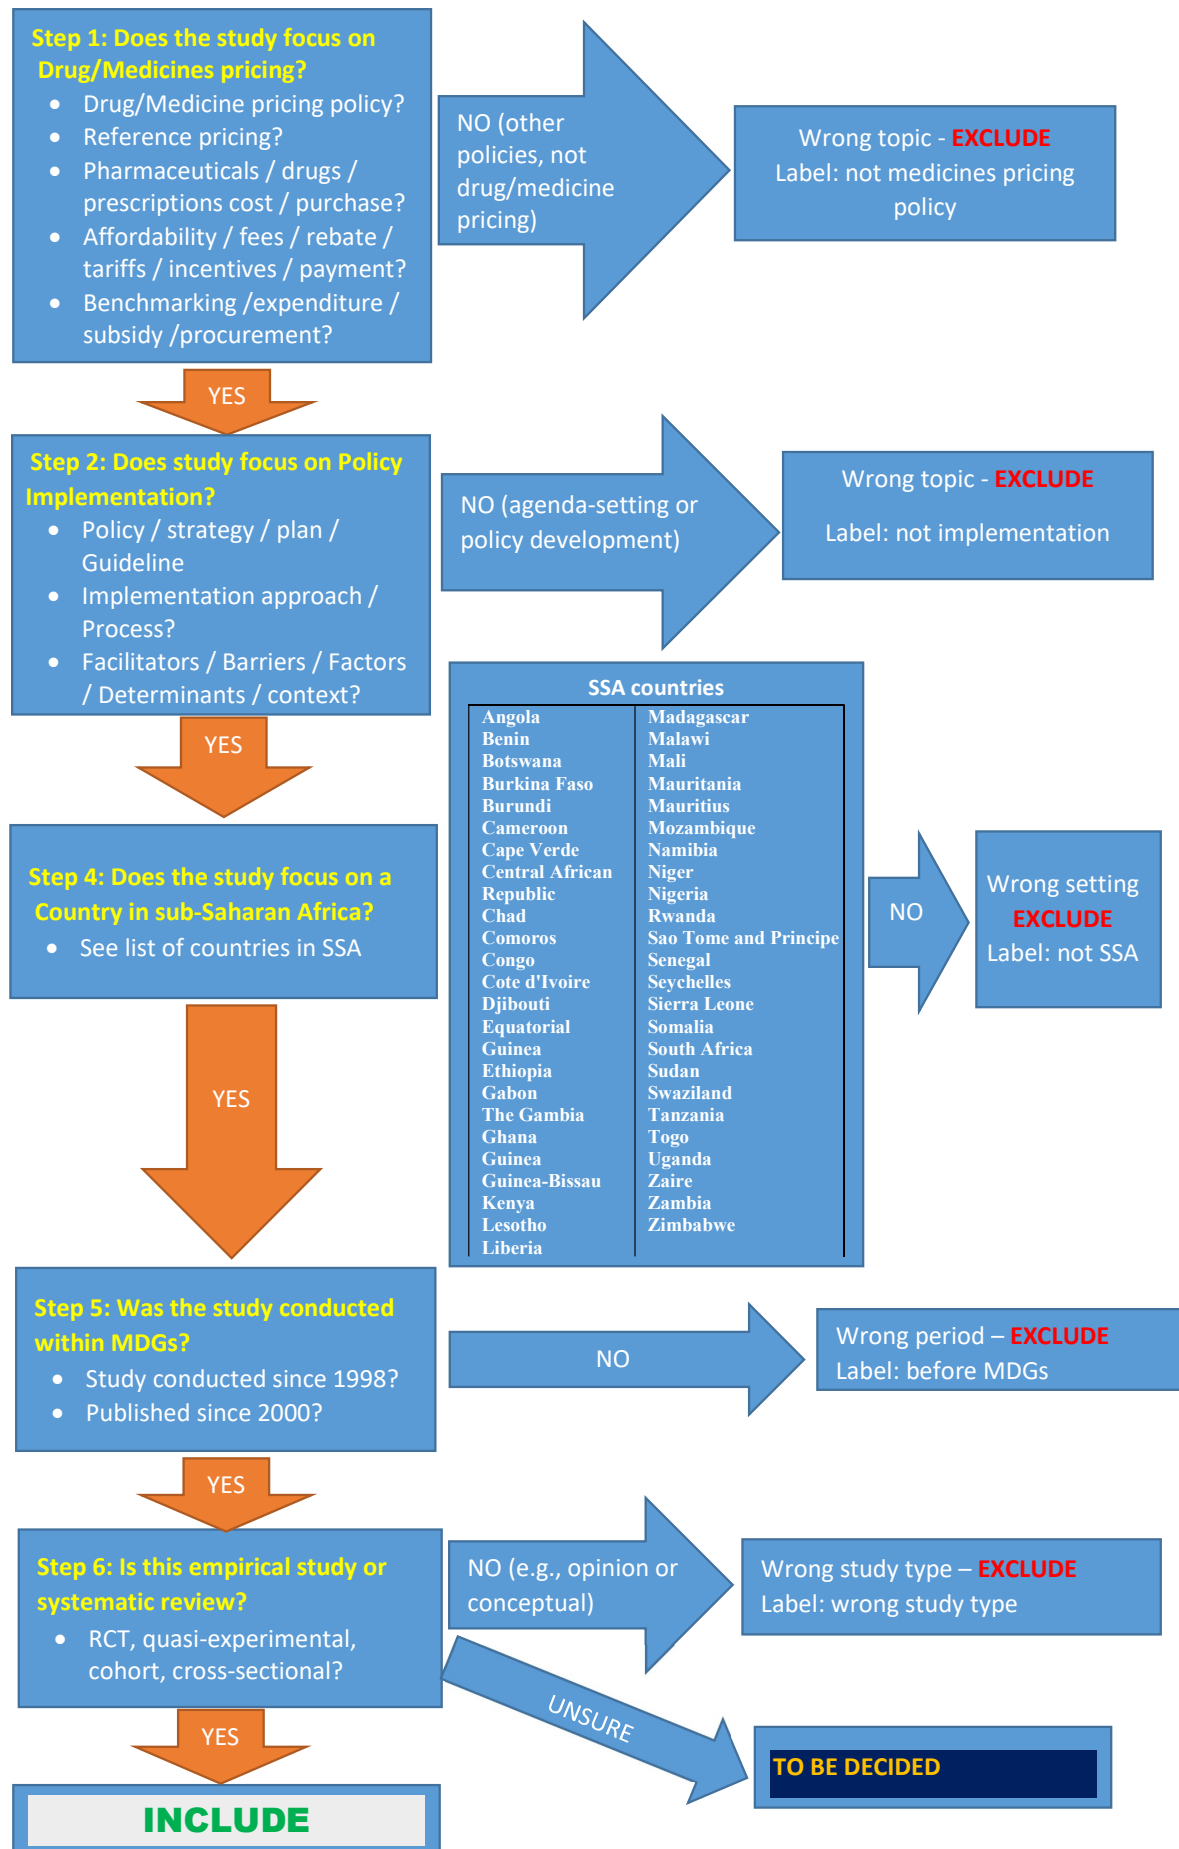

Supplement: bmjopen-2020-044293supp003.pdf [file bmjopen-2020-044293supp003.pdf]
